# Supplementary material for: Sequential Appearance and Isolation of a SARS-CoV-2 Recombinant between Two Major SARS-CoV-2 Variants in a Chronically Infected Immunocompromised Patient
Source: MDPI journal article supplement (doi:10.3390/v14061266), 2022-06-10
Supplement: s1 [file s1]

# Sequential Appearance and Isolation of a SARS-CoV-2 Recombinant between Two Major SARS-CoV-2 Variants in a Chronically Infected Immunocompromised Patient

Emilie Burel <sup>1,2,†</sup>, Philippe Colson <sup>1,2,3,†</sup>, Jean-Christophe Lagier <sup>1,2,3</sup>, Anthony Levasseur <sup>1,2</sup>, Marielle Bedotto <sup>1</sup>, Philippe Lavrard-Meyer <sup>1,2,3</sup>, Pierre-Edouard Fournier <sup>1,2,4</sup>, Bernard La Scola <sup>1,2,3,\*</sup> and Didier Raoult <sup>1,2,\*</sup>

<sup>1</sup> IHU Méditerranée Infection, 19-21 Boulevard Jean Moulin, 13005 Marseille, France; burel.emilie@hotmail.fr (E.B.); philippe.colson@univ-amu.fr (P.C.); jean-christophe.lagier@univ-amu.fr (J.-C.L.); anthony.levasseur@univ-amu.fr (A.L.); marielle.bedotto@gmail.com (M.B.); philippe.lavrard-meyer@ap-hm.fr (P.L.-M.); pierre-edouard.fournier@univ-amu.fr (P.-E.F.)

<sup>2</sup> Microbes Evolution Phylogeny and Infections (MEPHI), Institut de Recherche Pour le Développement (IRD), Aix-Marseille University, 27 Boulevard Jean Moulin, 13005 Marseille, France

<sup>3</sup> Assistance Publique-Hôpitaux de Marseille (AP-HM), 264 rue Saint-Pierre, 13005 Marseille, France

<sup>4</sup> Vecteurs-Infections Tropicales et Méditerranéennes (VITROME), Institut de Recherche Pour le Développement (IRD), Aix-Marseille University, 27 Boulevard Jean Moulin, 13005 Marseille, France

\* Correspondence: bernard.la-scola@univ-amu.fr (B.L.S.); didier.raoult@univ-amu.fr (D.R.); Tel.: +33-413-732-401 (B.L.S. & D.R.)

† These authors contributed equally to this work.

---

## 1. SUPPLEMENTARY METHODS

Nasopharyngeal samples from the immunocompromised patient were tested in our university hospital institute (Méditerranée Infection; <https://www.mediterranee-infection.com/>) from September 2020 to December 2021 for SARS-CoV-2 infection by real-time reverse-transcription-PCR (qPCR) using the BGI real-time fluorescent RT-PCR assay (BGI Genomics, Shanghai Fosun Long March Medical Science Co., Ltd., Shenzhen, China) or the NeuMoDx SARS-CoV-2 assay (NeuMoDx, Ann Arbor, Michigan). Cycle threshold values for qPCR positivity was 35. Outside our institute (medical biology laboratory Alphabio, hôpital Européen, France), SARS-CoV-2 qPCR was performed using the BD MAX System (Becton Dickinson, Sparks, MD, USA).

## 2. SUPPLEMENTARY RESULTS

### 2.1. Virological follow-up by SARS-CoV-2 real-time reverse-transcription-PCR (qPCR)

SARS-CoV-2 qPCR performed on nasopharyngeal samples was positive between September 2020 and January 2021, then negative once in February 2021 but positive again on the next sample tested in April 2021. Between May 2021 and August 2021, qPCR remained almost always positive being only transiently negative for  $\leq 3$  days. Then qPCR was consistently positive when performed between October and December 2021.

### 2.2. Nucleotide diversity at positions harboring signature mutations of the B.1.160 or Alpha variants

Regarding the SARS-CoV-2 genomes obtained from the respiratory samples, which were obtained with the Illumina technology except for the sample collected in August 2021 for which the genome was obtained with the Nanopore technology, nucleotide diversity at the 35 positions harboring signature mutations of the B.1.160 or Alpha variants differed according to the time of sample collection. It was low in September 2020, with a mean ( $\pm$ standard deviation) value of  $0.2 \pm 0.5\%$ , increased to reach high values in May 2021 ( $20.1 \pm 16.4\%$ ), June 2021 ( $14.7 \pm 14.3\%$ ), July 2021 ( $19.8 \pm 18.2\%$ ), and August 2021

---

---

(13.2±8.9%), then decreased to low values again in October 2021 (1.1±3.9%) and November 2021 (3.1±6.8%) (Figure 2 of the main text). The low nucleotide diversity observed for genomes obtained in October and November 2021 indicated that the mosaicism consisting in the presence of signature mutations of the two variants was not explained by a co-infection by these two variants or by a contamination of the samples prior or during the next-generation sequencing procedure.

Regarding the genomes obtained from the culture supernatants, which were all obtained with the Illumina technology, nucleotide diversity at positions harboring signature mutations of the B.1.160 or Alpha variants was low, indicating that these genomes, including those recombinants, were generated from a single viral isolate. Indeed, mean nucleotide diversity ranged between 0.6±2.0% and 4.3±6.4% (Figure 2 of the main text). The viral genomes obtained from the culture of the respiratory samples collected in November and December 2021 were highly similar to the viral genome obtained directly from the respiratory sample collected in November 2021.

### *2.3. Generation of additional sequence reads*

Sequencing of reverse-transcription-PCR-targeted regions: We attempted to generate sequence reads that are hybrids of the B.1.160 and Alpha variants from the respiratory sample collected in August 2021 by PCR amplification of the regions overlapping recombination sites then next-generation sequencing with the Oxford Nanopore Technology (ONT) on a GridION instrument (Oxford Nanopore Technologies Ltd., Oxford, United Kingdom). Amplicons corresponding to positions 3,100-4,570 (in reference to the genome of the Wuhan-Hu-1 isolate GenBank accession no. NC\_045512.2) were amplified using the following primers (in 5'-3' orientation): Forward: TTCAACCTGAAGAA-GAGCAA; reverse: TGGCATTGTAACAAGAGTTT. Amplicons corresponding to positions 24,813-29,074 were amplified using the following primers: Forward: ATGGAAAAGCACACTTTCCT; reverse: GCTTTAGTGGCAGTACGTTT. For the amplicons corresponding to positions 3,100-4,570, 56% and 87% of the reads were chimeras harboring both Alpha (C3267U) and Marseille-4 (C4543U) signature mutations from the respiratory samples collected in May 5th and in August 12th, 2021, respectively (Supplementary Material: Figures S3, S4). For the amplicon corresponding to positions 24,813-29,074, 70% of the reads were hybrids harboring Alpha (G24914C) and B.1.160 (G25563U, C25710U, C26735U, U26876C and G28975C) mutations, and 24% were hybrids harboring Alpha mutation G24914C and B.1.160 mutation G28975C (Supplementary Material: Figure S5).

Metagenomic sequencing: Next-generation sequencing was also carried out using a metagenomic approach with the Nanopore technology on a GridION instrument (Oxford Nanopore Technologies Ltd.) to attempt obtaining long sequence reads and detect additional reads that are hybrids of the B.1.160 and Alpha variants. For the first recombination site, four reads with a length ranging between 1,855-11,979 nucleotides were obtained, which harbored signature mutations of the Alpha (C3267U) and B.1.160 (C4543U) variants. For the third recombination site, four reads with a length comprised between 1,486-8,143 nucleotides were obtained that harbored signature mutations of the Alpha (G24914C) and B.1.160 (C25563U) variants (reads are available from URL: <https://www.mediterranee-infection.com/sars-cov-2-recombinant/>).

### *2.4. Viral culture*

Cytopathic effects were observed between 4 and 8 days after the inoculation of the nasopharyngeal samples on Vero E6 cells as previously described [1] (Table 2 of the main text).

### *2.5. Phylogenetic analyses based on SARS-CoV-2 genomes and spike gene sequences*

Phylogeny reconstructions were performed based on viral genomes or spike genes, which included sequences obtained directly from the nasopharyngeal samples and from the cultures, and their best BLAST hits from the IHU Méditerranée Infection sequence database that were classified as B.1.160 or Alpha variants [2]. The genome obtained from

---

the nasopharyngeal sample collected in September 2020 was clustered with genomes of the B.1.160 variant, apart from the other genomes obtained from the case-patient (Figure 3a of the main text). Other genomes obtained from the nasopharyngeal samples collected since May 2021 and those obtained from cultures of the nasopharyngeal samples collected since May 2021 were also clustered with genomes of the B.1.160 variant, but they were clustered together, apart from the other genomes. The Alpha variant genomes were clustered apart from all other genomes. Spike gene phylogeny showed the clusterisation with sequences of the B.1.160 variant of the sequences obtained from the case-patient either directly or post-culture from samples collected between September 2020 and June 2021 (Figure 3b of the main text). In contrast, sequences obtained from the case-patient either directly or post-culture from samples collected since August 2021 were clustered with Alpha variant sequences.

### 3. SUPPLEMENTARY FIGURES

*Supplementary Figure S1. Virological follow-up by real-time reverse transcription PCR (qPCR) targeting SARS-CoV-2 RNA for the patient.*

Time points of collection of nasopharyngeal samples used for direct next-generation sequencing are indicated by \*; time points of collection of samples from which positive culture was obtained leading to next-generation sequencing from the culture supernatant are indicated by #.

Nasopharyngeal samples from the immunocompromised patient were tested in our university hospital institute (Méditerranée Infection; <https://www.mediterranee-infection.com/>) from September 2020 to December 2021 for SARS-CoV-2 infection by real-time reverse-transcription-PCR (qPCR) using the BGI real-time fluorescent RT-PCR assay (BGI Genomics, Shanghai Fosun Long March Medical Science Co., Ltd., Shenzhen, China) or the NeuMoDx SARS-CoV-2 assay (NeuMoDx, Ann Arbor, Michigan). Cycle threshold values for qPCR positivity was 35. Outside our institute (medical biology laboratory Alphabio, hôpital Européen, France), SARS-CoV-2 qPCR was performed using the BD MAX System (Becton Dickinson, Sparks, MD, USA).

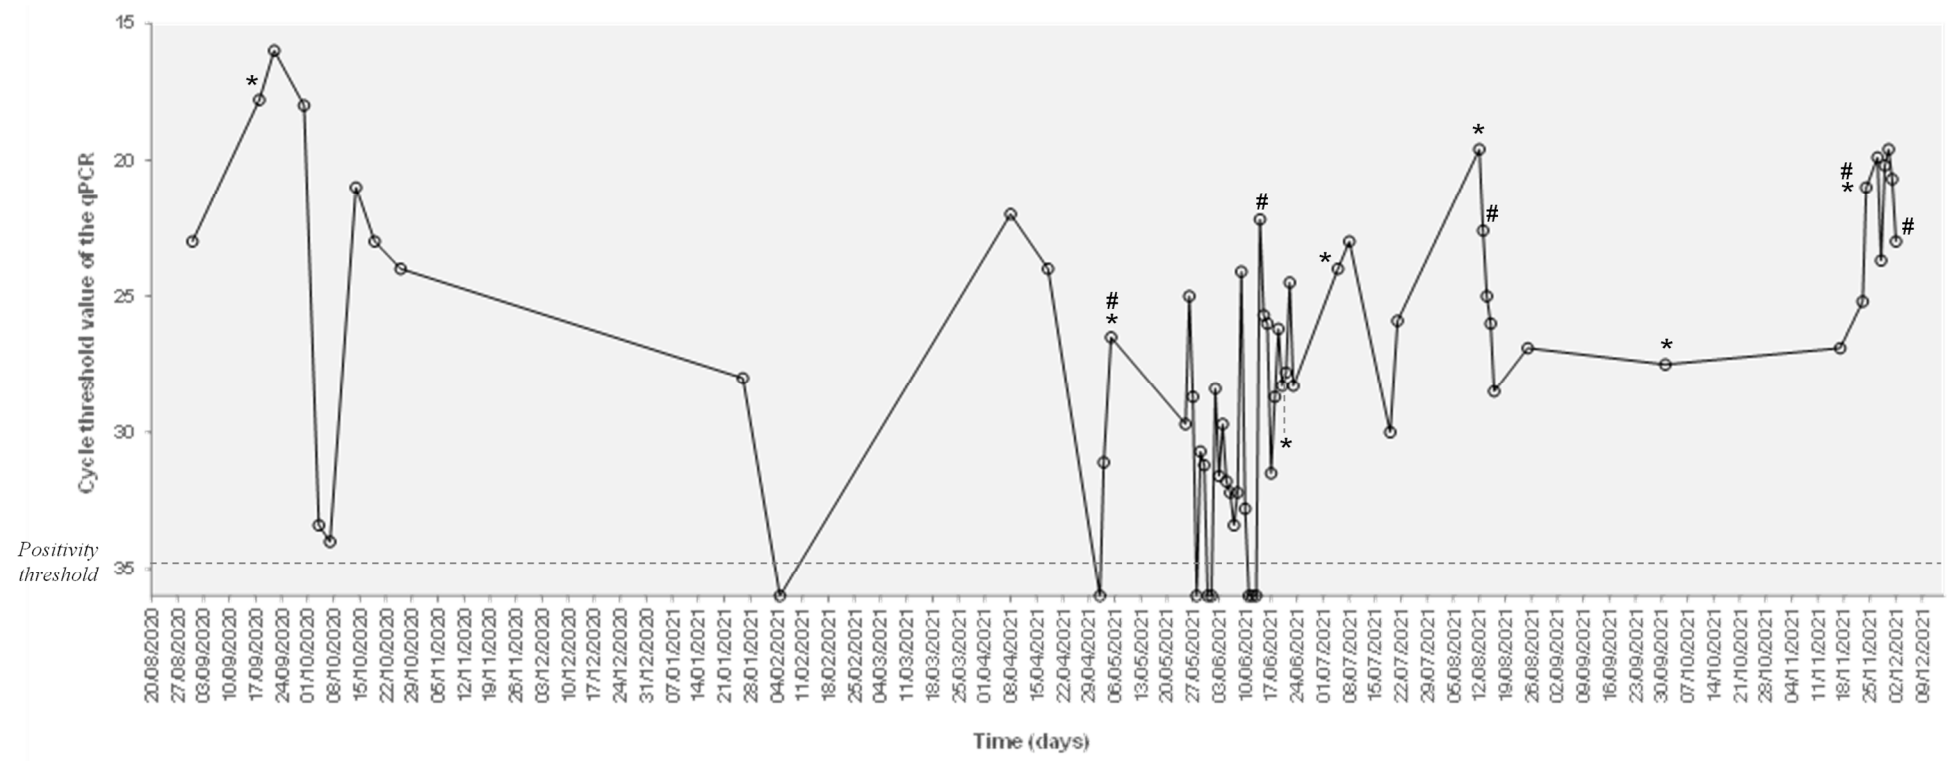

---

*Supplementary Figure S2. Majority nucleotides and nucleotide diversity for sequences obtained from the respiratory samples and the culture supernatant at nucleotide positions of the SARS-CoV-2 genome that harbor signature mutations of the B.1.160 or Alpha variants and at any other positions that harbor mutations (a), and sequencing depth at nucleotide positions (b).*

Del, nucleotide deletion.

Nucleotide positions are in reference to the genome of the Wuhan-Hu-1 isolate GenBank accession no. NC\_045512.2. Nucleotide diversity is the proportion of sequence reads that do not harbor the consensus (majority) nucleotide.

---

Supplementary Figure S2a.

| Nucleotide positions | Genes | Wuhan-Hu-1 isolate genome | Signature mutations in B.1.160/Marseille-4 genomes | Signature mutations in Alpha genomes | Majority nucleotides   |               |                 |                |                   |                   |                      |               |                 |                   |                     |                    | Nucleotide diversity (%) |               |                 |                |                   |                   |                      |               |                 |                   |                     |                    |
|----------------------|-------|---------------------------|----------------------------------------------------|--------------------------------------|------------------------|---------------|-----------------|----------------|-------------------|-------------------|----------------------|---------------|-----------------|-------------------|---------------------|--------------------|--------------------------|---------------|-----------------|----------------|-------------------|-------------------|----------------------|---------------|-----------------|-------------------|---------------------|--------------------|
|                      |       |                           |                                                    |                                      | Nasopharyngeal samples |               |                 |                |                   |                   | Culture supernatants |               |                 |                   |                     |                    | Nasopharyngeal samples   |               |                 |                |                   |                   | Culture supernatants |               |                 |                   |                     |                    |
|                      |       |                           |                                                    |                                      | September 18th, 2020   | May 5th, 2021 | June 21st, 2021 | July 5th, 2021 | August 12th, 2021 | October 1st, 2021 | November 24th, 2021  | May 5th, 2021 | June 14th, 2021 | August 13th, 2021 | November 24th, 2021 | December 2nd, 2021 | September 18th, 2020     | May 5th, 2021 | June 21th, 2021 | July 5th, 2021 | August 12th, 2021 | October 1st, 2021 | November 24th, 2021  | May 5th, 2021 | June 14th, 2021 | August 13th, 2021 | November 24th, 2021 | December 2nd, 2021 |
|                      |       |                           |                                                    |                                      | U                      | U             | U               | U              | U                 | U                 | U                    | U             | U               | U                 | U                   | U                  | U                        | U             | U               | U              | U                 | U                 | U                    | U             | U               | U                 | U                   | U                  |
| 241                  | C     | U                         | U                                                  | U                                    | U                      | U             | U               | U              | U                 | U                 | U                    | U             | U               | U                 | U                   | 0.0                | 0.0                      | 0.0           | 0.1             | 10.6           | 0.0               | 0.1               | 0.0                  | 0.1           | 0.0             | 0.0               | 0.4                 |                    |
| 629                  | C     | -                         | -                                                  | -                                    | U                      | U             | U               | U              | U                 | U                 | -                    | -             | -               | U                 | U                   | 0.2                | 45.5                     | 13.2          | 25.1            | 28.4           | 0.1               | 1.0               | 6.4                  | 0.1           | 0.2             | 0.1               | 0.3                 |                    |
| 696                  | A     | -                         | -                                                  | -                                    | -                      | -             | -               | U              | U                 | U                 | -                    | -             | -               | U                 | U                   | 0.0                | 37.5                     | 29.6          | 32.0            | 4.5            | 0.2               | 0.1               | 4.9                  | 0.0           | 0.1             | 0.5               | 0.2                 |                    |
| 913                  | C     | -                         | U                                                  | -                                    | -                      | -             | -               | U              | U                 | U                 | U                    | -             | -               | U                 | U                   | 0.0                | 33.9                     | 26.8          | 35.9            | 10.0           | 0.1               | 0.1               | 9.0                  | 0.1           | 0.1             | 0.1               | 0.3                 |                    |
| 981                  | C     | -                         | -                                                  | -                                    | -                      | -             | -               | -              | -                 | U                 | -                    | -             | -               | -                 | -                   | 0.0                | 0.0                      | 0.0           | 0.1             | 4.0            | 0.0               | 14.0              | 0.0                  | 0.2           | 0.1             | 0.4               | 0.4                 |                    |
| 1192                 | A     | -                         | -                                                  | -                                    | -                      | -             | -               | -              | -                 | G                 | -                    | -             | -               | -                 | -                   | 0.2                | 0.0                      | 0.1           | 0.2             | 2.6            | 33.3              | 0.0               | 0.0                  | 0.0           | 0.1             | 0.1               | 0.1                 |                    |
| 1677                 | A     | -                         | -                                                  | -                                    | -                      | -             | -               | -              | -                 | -                 | -                    | -             | -               | -                 | C                   | 0.0                | 0.0                      | 0.0           | 0.0             | 2.3            | 0.0               | 15.0              | 0.1                  | 0.1           | 0.1             | 0.3               | 0.0                 |                    |
| 1683                 | U     | -                         | -                                                  | -                                    | -                      | -             | -               | -              | -                 | -                 | -                    | -             | -               | -                 | C                   | 0.0                | 0.0                      | 0.0           | 0.0             | 1.4            | 0.0               | 18.5              | 0.1                  | 0.1           | 0.0             | 0.1               | 0.1                 |                    |
| 1895                 | G     | -                         | -                                                  | -                                    | -                      | -             | -               | -              | -                 | A                 | -                    | -             | -               | -                 | -                   | 0.5                | 0.0                      | 0.0           | 0.0             | 6.4            | 0.0               | 0.0               | 0.0                  | 0.0           | 0.5             | 0.0               | 0.3                 |                    |
| 1978                 | U     | -                         | -                                                  | -                                    | -                      | -             | -               | -              | -                 | C                 | -                    | -             | -               | -                 | -                   | 0.1                | 0.0                      | 0.0           | 0.0             | 1.0            | 12.7              | 0.2               | 0.1                  | 0.2           | 0.0             | 0.2               | 0.3                 |                    |
| 2509                 | C     | -                         | -                                                  | -                                    | -                      | -             | -               | -              | -                 | -                 | -                    | -             | -               | -                 | U                   | 0.5                | 0.0                      | 0.0           | 0.0             | 3.4            | 0.0               | 7.4               | 0.0                  | 0.0           | 0.0             | 0.8               | 0.0                 |                    |
| 2594                 | C     | -                         | -                                                  | -                                    | -                      | -             | -               | -              | -                 | U                 | -                    | -             | -               | -                 | U                   | 0.0                | 0.0                      | 0.0           | 0.0             | 2.2            | 0.0               | 0.0               | 0.1                  | 0.0           | 0.0             | 0.1               | 0.2                 |                    |
| 2706                 | C     | -                         | -                                                  | -                                    | U                      | U             | -               | -              | -                 | U                 | U                    | U             | -               | U                 | U                   | 0.1                | 43.6                     | 25.0          | 28.1            | 5.4            | 0.0               | 0.1               | 4.3                  | 0.1           | 0.0             | 0.2               | 0.0                 |                    |
| 3037                 | C     | U                         | U                                                  | U                                    | U                      | U             | U               | U              | U                 | U                 | U                    | U             | U               | U                 | U                   | 0.3                | 0.3                      | 1.3           | 0.0             | 20.8           | 0.0               | 0.1               | 0.0                  | 0.1           | 0.0             | 0.4               | 0.1                 |                    |
| 3193                 | A     | -                         | -                                                  | -                                    | -                      | -             | -               | G              | G                 | G                 | -                    | -             | -               | G                 | -                   | 0.3                | 0.0                      | 25.5          | 33.4            | 21.2           | 0.9               | 0.0               | 0.0                  | 0.0           | 2.6             | 0.0               | 0.6                 |                    |
| 3224                 | A     | -                         | -                                                  | -                                    | -                      | -             | -               | -              | -                 | G                 | -                    | -             | -               | -                 | -                   | 0.0                | 0.0                      | 0.0           | 0.0             | 6.3            | 0.1               | 0.1               | 0.0                  | 0.0           | 0.0             | 0.0               | 0.0                 |                    |
| 3267                 | C     | -                         | U                                                  | -                                    | -                      | -             | -               | U              | U                 | U                 | -                    | -             | -               | U                 | -                   | 0.0                | 28.8                     | 23.7          | 39.3            | 6.8            | 0.0               | 0.0               | 2.4                  | 0.1           | 0.2             | 0.4               | 0.1                 |                    |
| 3340                 | G     | -                         | -                                                  | -                                    | -                      | -             | -               | -              | -                 | -                 | -                    | -             | -               | -                 | U                   | 0.0                | 16.8                     | 0.0           | 0.0             | 2.3            | 0.1               | 12.7              | 0.1                  | 0.1           | 0.0             | 0.0               | 0.3                 |                    |
| 3393                 | C     | -                         | -                                                  | -                                    | -                      | -             | -               | U              | -                 | -                 | -                    | -             | -               | U                 | U                   | 0.3                | 28.7                     | 43.4          | 20.8            | 4.6            | 0.0               | 0.2               | 2.4                  | 0.0           | 0.0             | 0.0               | 0.1                 |                    |
| 4543                 | C     | U                         | -                                                  | U                                    | U                      | U             | U               | U              | U                 | U                 | U                    | U             | U               | U                 | U                   | 0.1                | 0.0                      | 0.0           | 0.0             | 7.8            | 0.0               | 0.1               | 0.3                  | 0.2           | 0.2             | 0.8               | 0.0                 |                    |
| 4872                 | A     | -                         | -                                                  | -                                    | G                      | G             | -               | -              | -                 | -                 | G                    | G             | -               | -                 | -                   | 0.1                | 0.0                      | 12.5          | 37.1            | 2.9            | 0.0               | 0.0               | 0.0                  | 0.1           | 0.0             | 0.1               | 0.1                 |                    |
| 4878                 | C     | -                         | -                                                  | -                                    | U                      | U             | U               | U              | U                 | U                 | U                    | U             | U               | U                 | U                   | 0.0                | 0.0                      | 0.0           | 0.0             | 6.6            | 0.0               | 0.2               | 0.1                  | 0.1           | 0.1             | 0.2               | 0.2                 |                    |
| 4893                 | C     | -                         | -                                                  | -                                    | -                      | -             | -               | U              | U                 | U                 | U                    | -             | -               | U                 | U                   | 0.1                | 0.0                      | 27.3          | 43.3            | 5.2            | 0.6               | 0.0               | 0.1                  | 0.0           | 0.2             | 0.1               | 0.2                 |                    |
| 4904                 | G     | -                         | -                                                  | -                                    | -                      | A             | -               | -              | -                 | -                 | A                    | A             | -               | -                 | -                   | 0.0                | 10.5                     | 30.0          | 47.9            | 1.7            | 0.0               | 0.0               | 4.8                  | 0.0           | 0.0             | 0.2               | 0.1                 |                    |
| 5278                 | U     | -                         | -                                                  | -                                    | -                      | -             | -               | -              | -                 | -                 | -                    | -             | -               | -                 | C                   | 0.9                | 0.0                      | 0.0           | 0.0             | 2.1            | 0.0               | 14.6              | 0.0                  | 0.0           | 0.0             | 8.0               | 0.0                 |                    |
| 5629                 | G     | U                         | -                                                  | U                                    | U                      | U             | U               | U              | U                 | U                 | U                    | U             | U               | U                 | U                   | 2.8                | 0.5                      | 1.6           | 0.2             | 11.4           | 0.6               | 0.0               | 0.8                  | 1.9           | 0.9             | 5.3               | 1.5                 |                    |
| 5648                 | A     | -                         | -                                                  | -                                    | -                      | -             | -               | -              | -                 | -                 | C                    | -             | -               | -                 | C                   | 0.1                | 0.1                      | 0.0           | 0.0             | 1.6            | 0.0               | 0.1               | 0.1                  | 0.0           | 0.0             | 0.2               | 0.1                 |                    |
| 5986                 | C     | -                         | U                                                  | -                                    | -                      | -             | -               | -              | -                 | -                 | -                    | -             | U               | -                 | -                   | 0.0                | 0.0                      | 0.0           | 0.0             | 10.3           | 0.0               | 0.0               | 0.0                  | 0.0           | 18.4            | 0.0               | 0.1                 |                    |
| 6629                 | C     | -                         | -                                                  | -                                    | -                      | U             | -               | -              | -                 | -                 | -                    | U             | -               | -                 | -                   | 0.0                | 0.0                      | 37.7          | 15.6            | 5.6            | 0.0               | 0.0               | 0.0                  | 0.0           | 0.3             | 0.3               | 0.1                 | 0.1                |
| 6633                 | C     | -                         | -                                                  | -                                    | U                      | U             | U               | U              | U                 | U                 | U                    | U             | U               | U                 | U                   | 0.0                | 0.2                      | 0.0           | 0.0             | 11.0           | 0.1               | 0.0               | 0.0                  | 0.1           | 0.3             | 0.1               | 0.2                 |                    |
| 7113                 | C     | -                         | -                                                  | -                                    | -                      | -             | -               | -              | -                 | -                 | U                    | -             | -               | -                 | U                   | 0.0                | 0.0                      | -             | -               | 3.4            | 0.0               | 15.5              | 0.0                  | 0.0           | 0.0             | 0.3               | 1.5                 |                    |
| 7185                 | U     | -                         | -                                                  | -                                    | C                      | C             | C               | C              | C                 | C                 | C                    | C             | C               | C                 | C                   | 0.1                | 0.0                      | 0.0           | 0.0             | 10.9           | 0.0               | 0.0               | 0.1                  | 0.0           | 0.0             | 0.4               | 0.1                 |                    |
| 7279                 | C     | -                         | -                                                  | -                                    | -                      | -             | -               | -              | -                 | -                 | -                    | -             | -               | -                 | -                   | 0.1                | 0.0                      | 0.0           | 0.0             | 2.7            | 2.5               | 0.0               | 0.3                  | 0.3           | 0.5             | 0.3               | 0.5                 |                    |
| 8191                 | U     | -                         | -                                                  | -                                    | -                      | -             | -               | -              | -                 | -                 | -                    | -             | -               | A                 | -                   | 0.1                | 0.0                      | 0.0           | 0.0             | 12.0           | 0.2               | 0.2               | 0.1                  | 0.0           | 16.0            | 0.2               | 0.0                 |                    |
| 8770                 | C     | -                         | -                                                  | -                                    | U                      | -             | -               | -              | -                 | -                 | -                    | -             | -               | -                 | -                   | 0.0                | 47.2                     | 0.0           | 0.0             | 10.6           | 0.0               | 0.1               | 3.1                  | 0.1           | 0.0             | 0.7               | 0.1                 |                    |
| 8950                 | C     | -                         | -                                                  | -                                    | -                      | -             | -               | -              | -                 | -                 | -                    | U             | -               | -                 | -                   | 0.1                | 0.0                      | 48.1          | 14.9            | 1.6            | 0.1               | 0.1               | 0.2                  | 0.1           | 0.1             | 0.2               | 0.1                 |                    |
| 9042                 | C     | -                         | -                                                  | -                                    | U                      | U             | U               | U              | U                 | U                 | U                    | U             | U               | U                 | U                   | 0.0                | 0.1                      | 0.1           | 0.2             | 17.7           | 0.0               | 0.1               | 0.1                  | 0.5           | 0.1             | 0.1               | 0.3                 |                    |
| 9120                 | C     | -                         | -                                                  | -                                    | U                      | U             | U               | U              | U                 | U                 | U                    | U             | U               | U                 | U                   | 0.0                | 0.0                      | 0.0           | 0.0             | 8.6            | 0.0               | 0.3               | 0.0                  | 0.0           | 0.0             | 0.1               | 0.2                 | 0.3                |
| 9501                 | C     | -                         | -                                                  | -                                    | U                      | -             | U               | U              | U                 | U                 | U                    | U             | U               | U                 | U                   | 0.0                | 0.0                      | -             | -               | 9.1            | 0.0               | 0.0               | 0.6                  | 2.6           | 0.4             | 0.5               | 2.2                 |                    |
| 9526                 | G     | U                         | -                                                  | U                                    | U                      | U             | U               | U              | U                 | U                 | U                    | U             | U               | U                 | U                   | 0.1                | 0.0                      | 0.0           | 0.0             | 4.6            | 0.0               | 0.8               | 1.2                  | 0.2           | 0.2             | 0.0               | 0.3                 |                    |
| 9626                 | U     | -                         | -                                                  | -                                    | C                      | -             | -               | -              | -                 | -                 | -                    | -             | -               | -                 | -                   | 0.0                | 50.0                     | -             | -               | 0.0            | 15.5              | 0.0               | 0.0                  | 0.3           | 0.1             | 0.0               | 0.0                 | 0.5                |
| 9783                 | G     | -                         | -                                                  | -                                    | -                      | -             | -               | C              | -                 | -                 | -                    | -             | -               | -                 | -                   | 0.0                | 0.0                      | -             | -               | 35.0           | 0.0               | 0.0               | 0.0                  | 0.0           | 0.0             | 0.0               | 0.2                 |                    |
| 9792                 | A     | -                         | -                                                  | -                                    | -                      | C             | -               | -              | -                 | -                 | -                    | -             | -               | -                 | -                   | 0.0                | 16.7                     | 0.0           | 0.0             | 2.2            | 0.0               | 0.0               | 1.2                  | 0.0           | 0.0             | 0.0               | 0.0                 |                    |
| 9811                 | C     | -                         | -                                                  | -                                    | -                      | -             | -               | -              | -                 | -                 | U                    | -             | -               | -                 | U                   | 0.1                | 0.0                      | 0.0           | 0.0             | 6.1            | 0.0               | 2.9               | 0.0                  | 0.1           | 0.2             | 0.7               | 0.6                 |                    |
| 9972                 | A     | -                         | -                                                  | -                                    | -                      | -             | -               | -              | -                 | -                 | G                    | -             | -               | -                 | -                   | 0.0                | 0.0                      | 0.0           | 0.0             | 5.7            | 0.0               | 21.6              | 0.0                  | 0.0           | 0.2             | 0.0               | 0.1                 |                    |
| 11083                | G     | -                         | -                                                  | -                                    | -                      | -             | -               | -              | -                 | -                 | -                    | U             | -               | -                 | -                   | 1.0                | 1.1                      | 0.0           | 0.0             | 2.2            | 0.0               | 0.7               | 27.1                 | 0.1           | 0.1             | 0.1               | 0.7                 | 0.5                |
| 11208                | C     | -                         | -                                                  | -                                    | U                      | U             | U               | U              | U                 | U                 | U                    | U             | U               | U                 | U                   | 0.0                | 0.0                      | 0.2           | 0.1             | 4.6            | 0.2               | 0.0               | 0.2                  | 0.1           | 0.0             | 0.2               | 0.1                 |                    |
| 11365                | G     | -                         | -                                                  | -                                    | -                      | -             | -               | -              | -                 | -                 | U                    | -             | -               | -                 | U                   | 0.0                | 0.0                      | 0.0           | 0.0             | 2.3            | 0.0               | 19.2              | 0.1                  | 0.0           | 0.0             | 0.1               | 0.1                 |                    |
| 11497                | C     | U                         | -                                                  | U                                    | U                      | U             | U               | U              | U                 | U                 | U                    | U             | U               | U                 | U                   | 0.4                | 0.0                      | 0.0           | 0.3             | 2.5            | 0.4               | 0.0               | 0.1                  | 0.3           | 0.2             | 0.1               | 0.2                 |                    |
| 12459                | C     | -                         | -                                                  | -                                    | -                      | U             | -               | -              | -                 | -                 | -                    | U             | -               | -                 | -                   | 0.4                | 0.0                      | 45.8          | 20.6            | 3.1            | 0.0               | 0.1               | 0.3                  | 0.1           | 0.4             | 0.2               | 0.3                 |                    |
| 12592                | U     | -                         | -                                                  | -                                    | -                      | C             | -               | -              | -                 | -                 | -                    | C             | -               | -                 | -                   | 0.0                | 0.2                      | 39.0          | 23.5            | 2.1            | 0.0               | 0.0               | 0.1                  | 0.1           | 0.0             | 0.1               | 0.1                 |                    |

Supplementary Figure S2a (continued)

| Nucleotide positions | Genes  | Wuhan-Hu-1 isolate genome<br>Signature mutations in<br>B.1.160/Marseille-4 genomes<br>Signature mutations in Alpha<br>genomes | Majority nucleotides   |               |                 |                |                   |                   |                      |               |                 |                   |                     |                    | Nucleotide diversity (%) |               |                 |                |                   |                   |                      |               |                 |                   |                     |                    |     |
|----------------------|--------|-------------------------------------------------------------------------------------------------------------------------------|------------------------|---------------|-----------------|----------------|-------------------|-------------------|----------------------|---------------|-----------------|-------------------|---------------------|--------------------|--------------------------|---------------|-----------------|----------------|-------------------|-------------------|----------------------|---------------|-----------------|-------------------|---------------------|--------------------|-----|
|                      |        |                                                                                                                               | Nasopharyngeal samples |               |                 |                |                   |                   | Culture supernatants |               |                 |                   |                     |                    | Nasopharyngeal samples   |               |                 |                |                   |                   | Culture supernatants |               |                 |                   |                     |                    |     |
|                      |        |                                                                                                                               | September 18th, 2020   | May 5th, 2021 | June 21st, 2021 | July 5th, 2021 | August 12th, 2021 | October 1st, 2021 | November 24th, 2021  | May 5th, 2021 | June 14th, 2021 | August 13th, 2021 | November 24th, 2021 | December 2nd, 2021 | September 18th, 2020     | May 5th, 2021 | June 21th, 2021 | July 5th, 2021 | August 12th, 2021 | October 1st, 2021 | November 24th, 2021  | May 5th, 2021 | June 14th, 2021 | August 13th, 2021 | November 24th, 2021 | December 2nd, 2021 |     |
| 13506                | ORF 1b | C                                                                                                                             | -                      | -             | -               | -              | -                 | -                 | -                    | -             | -               | -                 | -                   | -                  | 0.0                      | 0.0           | 0.0             | 0.0            | 13.9              | 0.0               | 0.0                  | 0.0           | 0.0             | 0.1               | 0.0                 | 0.1                | 0.1 |
| 13517                |        | C                                                                                                                             | -                      | -             | -               | -              | -                 | -                 | -                    | -             | -               | -                 | -                   | -                  | 0.3                      | 0.0           | 0.0             | 0.0            | 3.6               | 16.7              | 0.1                  | 0.4           | 0.1             | 0.6               | 0.1                 | 0.2                |     |
| 13860                |        | C                                                                                                                             | -                      | -             | -               | -              | -                 | -                 | -                    | -             | -               | -                 | -                   | -                  | 0.2                      | 0.1           | 24.2            | 35.4           | 3.9               | 0.1               | 0.1                  | 0.1           | 0.2             | 0.0               | 0.1                 | 0.2                |     |
| 13936                |        | G                                                                                                                             | -                      | -             | -               | -              | -                 | -                 | -                    | -             | -               | -                 | -                   | -                  | 0.0                      | 0.0           | 0.1             | 0.0            | 4.3               | 0.3               | 0.0                  | 0.1           | 0.0             | 0.0               | 0.1                 | 3.0                |     |
| 13993                |        | G                                                                                                                             | U                      | -             | -               | -              | -                 | -                 | -                    | -             | -               | -                 | -                   | -                  | 0.1                      | 0.1           | 0.0             | 0.1            | 5.4               | 0.1               | 0.0                  | 0.0           | 0.1             | 0.0               | 0.3                 | 0.0                |     |
| 14408                |        | C                                                                                                                             | U                      | U             | U               | U              | U                 | U                 | U                    | U             | U               | U                 | U                   | U                  | 0.1                      | 0.1           | 0.0             | 0.1            | 11.0              | 0.1               | 0.4                  | 0.1           | 0.3             | 0.0               | 0.3                 | 0.2                |     |
| 15766                |        | G                                                                                                                             | U                      | -             | -               | -              | -                 | -                 | -                    | -             | -               | -                 | -                   | -                  | 0.1                      | 0.3           | 0.0             | 0.1            | 9.2               | 0.0               | 0.0                  | 0.0           | 0.1             | 0.0               | 0.1                 | 0.1                |     |
| 16128                |        | A                                                                                                                             | -                      | -             | -               | -              | -                 | -                 | -                    | -             | -               | -                 | -                   | -                  | 0.2                      | 0.0           | 0.1             | 0.1            | 2.3               | 0.0               | 13.9                 | 0.0           | 0.0             | 0.0               | 12.1                | 0.0                |     |
| 16675                |        | C                                                                                                                             | -                      | -             | -               | -              | -                 | -                 | -                    | -             | -               | -                 | -                   | -                  | 0.1                      | 0.2           | 0.0             | 0.2            | 13.2              | 0.1               | 0.0                  | 0.1           | 0.7             | 0.5               | 0.2                 | 0.1                |     |
| 16751                |        | C                                                                                                                             | -                      | -             | -               | -              | -                 | -                 | -                    | -             | -               | -                 | -                   | -                  | 7.0                      | 0.0           | 0.0             | 0.2            | 11.2              | 0.4               | 0.6                  | 0.3           | 0.9             | 0.0               | 0.6                 | 0.0                |     |
| 16889                | ORF 1b | A                                                                                                                             | G                      | -             | -               | -              | -                 | -                 | -                    | -             | -               | -                 | -                   | -                  | 0.1                      | 0.0           | 0.0             | 0.0            | 7.7               | 0.0               | 0.2                  | 0.0           | 0.1             | 0.0               | 0.3                 | 0.1                |     |
| 17019                |        | G                                                                                                                             | U                      | -             | -               | -              | -                 | -                 | -                    | -             | -               | -                 | -                   | -                  | 0.0                      | 0.0           | 0.0             | 0.0            | 15.6              | 0.0               | 0.0                  | 0.3           | 0.2             | 0.4               | 0.1                 | 0.1                |     |
| 17122                |        | G                                                                                                                             | -                      | -             | -               | -              | -                 | -                 | -                    | -             | -               | -                 | -                   | -                  | 0.1                      | 0.0           | 0.0             | 0.0            | 11.9              | 0.1               | 16.0                 | 0.0           | 0.1             | 0.1               | 0.1                 | 0.1                |     |
| 17125                |        | C                                                                                                                             | -                      | -             | -               | -              | -                 | -                 | -                    | -             | -               | -                 | -                   | -                  | 0.1                      | 0.0           | 18.9            | 43.4           | 18.4              | 0.1               | 0.0                  | 0.1           | 0.0             | 0.1               | 0.2                 | 0.2                |     |
| 17251                |        | C                                                                                                                             | -                      | -             | -               | -              | -                 | -                 | -                    | -             | -               | -                 | -                   | -                  | 0.0                      | 0.3           | 0.1             | 0.1            | 11.1              | 0.2               | 0.1                  | 0.2           | 0.1             | 0.1               | 0.5                 | 0.5                |     |
| 17721                |        | G                                                                                                                             | -                      | -             | -               | -              | -                 | -                 | -                    | -             | -               | -                 | -                   | -                  | 0.1                      | 0.0           | 0.0             | 0.0            | 5.0               | 0.0               | 11.7                 | 0.1           | 0.1             | 0.1               | 0.2                 | 0.3                |     |
| 17738                |        | C                                                                                                                             | -                      | -             | -               | -              | -                 | -                 | -                    | -             | -               | -                 | -                   | -                  | 0.0                      | 0.0           | 0.0             | 0.1            | 9.3               | 1.0               | 0.0                  | 0.1           | 0.1             | 0.1               | 0.2                 | 0.1                |     |
| 18023                |        | A                                                                                                                             | -                      | -             | -               | -              | -                 | -                 | -                    | -             | -               | -                 | -                   | -                  | 0.0                      | 0.2           | 0.1             | 0.1            | 0.9               | 0.2               | 22.3                 | 0.2           | 0.0             | 0.1               | 0.5                 | 0.4                |     |
| 18877                |        | C                                                                                                                             | U                      | -             | -               | -              | -                 | -                 | -                    | -             | -               | -                 | -                   | -                  | 0.0                      | 47.0          | 0.0             | 0.0            | 6.8               | 0.0               | 0.1                  | 2.7           | 0.2             | 0.0               | 0.2                 | 0.1                |     |
| 19186                |        | C                                                                                                                             | -                      | -             | -               | -              | -                 | -                 | -                    | -             | -               | -                 | -                   | -                  | 0.1                      | 0.1           | 0.1             | 0.0            | 4.5               | 0.0               | 0.5                  | 0.3           | 0.0             | 0.2               | 44.5                | 0.1                |     |
| 19547                | SPIKE  | C                                                                                                                             | -                      | -             | -               | -              | -                 | -                 | -                    | -             | -               | -                 | -                   | -                  | 0.0                      | 0.0           | 0.0             | 0.0            | 4.9               | 0.0               | 0.0                  | 0.0           | 0.0             | 15.2              | 0.1                 | 0.3                |     |
| 19947                |        | G                                                                                                                             | -                      | -             | -               | -              | -                 | -                 | -                    | -             | -               | -                 | -                   | -                  | 0.0                      | 0.0           | 0.0             | 0.0            | 59.4              | 0.0               | 0.2                  | 0.0           | 0.2             | 0.0               | 0.4                 | 0.1                |     |
| 20930                |        | C                                                                                                                             | -                      | -             | -               | -              | -                 | -                 | -                    | -             | -               | -                 | -                   | -                  | 0.1                      | 18.5          | 0.0             | 0.0            | 5.8               | 0.1               | 0.0                  | 6.2           | 0.1             | 0.0               | 0.2                 | 0.1                |     |
| 21219                |        | C                                                                                                                             | -                      | -             | -               | -              | -                 | -                 | -                    | -             | -               | -                 | -                   | -                  | 0.0                      | 0.0           | 0.0             | 0.0            | 0.0               | 0.0               | 30.1                 | 0.1           | 0.0             | 0.0               | 0.2                 | 0.1                |     |
| 21232                |        | G                                                                                                                             | -                      | -             | -               | -              | -                 | -                 | -                    | -             | -               | -                 | -                   | -                  | 0.1                      | 0.0           | 0.0             | 0.0            | 0.0               | 0.0               | 19.3                 | 0.0           | 0.1             | 0.0               | 0.3                 | 0.3                |     |
| 21575                |        | C                                                                                                                             | -                      | -             | -               | -              | -                 | -                 | -                    | -             | -               | -                 | -                   | -                  | 1.2                      | 44.4          | 42.4            | 14.4           | 8.2               | 0.0               | 0.5                  | 4.4           | 1.2             | 5.4               | 0.1                 | 0.5                |     |
| 21765                |        | U                                                                                                                             | -                      | Del           | -               | -              | -                 | Del               | Del                  | Del           | -               | -                 | Del                 | Del                | 0.1                      | 14.7          | 11.0            | 38.3           | 39.2              | 22.6              | 22.9                 | 2.1           | 0.0             | 21.8              | 23.7                | 21.2               |     |
| 21766                |        | A                                                                                                                             | -                      | Del           | -               | -              | -                 | Del               | Del                  | Del           | -               | -                 | Del                 | Del                | 0.0                      | 16.2          | 11.8            | 44.0           | 10.9              | 1.6               | 1.1                  | 2.2           | 0.0             | 1.2               | 1.6                 | 1.0                |     |
| 21767                |        | C                                                                                                                             | -                      | Del           | -               | -              | -                 | Del               | Del                  | Del           | -               | -                 | Del                 | Del                | 0.1                      | 15.4          | 11.1            | 42.8           | 19.6              | 0.0               | 0.0                  | 2.1           | 0.0             | 0.0               | 0.1                 | 0.0                |     |
| 21768                |        | A                                                                                                                             | -                      | Del           | -               | -              | -                 | Del               | Del                  | Del           | -               | -                 | Del                 | Del                | 0.0                      | 15.4          | 11.2            | 43.1           | 10.4              | 0.0               | 0.0                  | 2.1           | 0.0             | 0.0               | 0.1                 | 0.1                |     |
| 21769                |        | U                                                                                                                             | -                      | Del           | -               | -              | -                 | Del               | Del                  | Del           | -               | -                 | Del                 | Del                | 0.0                      | 15.6          | 11.5            | 43.7           | 13.7              | 0.2               | 0.2                  | 2.1           | 0.1             | 0.2               | 0.5                 | 0.5                |     |
| 21770                |        | G                                                                                                                             | -                      | Del           | -               | -              | -                 | Del               | Del                  | Del           | -               | -                 | Del                 | Del                | 0.1                      | 18.2          | 15.2            | 47.6           | 9.6               | 5.6               | 5.6                  | 3.6           | 0.0             | 7.2               | 6.4                 | 6.5                |     |
| 21991                | ORF 3a | U                                                                                                                             | -                      | Del           | -               | -              | -                 | Del               | Del                  | Del           | -               | -                 | Del                 | Del                | 0.0                      | 20.3          | 17.3            | 18.6           | 22.1              | 1.3               | 4.3                  | 0.1           | 2.1             | 2.5               | 0.7                 | 1.4                |     |
| 21992                |        | U                                                                                                                             | -                      | Del           | -               | -              | -                 | Del               | Del                  | Del           | -               | -                 | Del                 | Del                | 0.1                      | 20.4          | 16.9            | 18.1           | 20.3              | 1.3               | 5.6                  | 0.1           | 2.1             | 2.5               | 2.0                 | 2.1                |     |
| 21993                |        | A                                                                                                                             | -                      | Del           | -               | -              | -                 | Del               | Del                  | Del           | -               | -                 | Del                 | Del                | 0.1                      | 20.6          | 16.7            | 17.7           | 17.8              | 3.7               | 18.9                 | 0.1           | 11.5            | 7.4               | 10.7                | 12.6               |     |
| 22992                |        | G                                                                                                                             | A                      | -             | A               | -              | -                 | -                 | -                    | -             | A               | A                 | -                   | -                  | 0.3                      | 33.3          | -               | 20.6           | 4.8               | 0.0               | 0.0                  | 5.5           | 0.1             | 0.0               | 0.2                 | 0.3                |     |
| 23063                |        | A                                                                                                                             | -                      | U             | -               | -              | -                 | U                 | U                    | U             | -               | -                 | U                   | U                  | 0.0                      | 50.0          | 33.3            | 27.1           | 12.4              | 0.0               | 0.0                  | 6.7           | 0.1             | 0.0               | 0.4                 | 0.4                |     |
| 23188                |        | C                                                                                                                             | -                      | -             | -               | -              | -                 | -                 | -                    | -             | U               | -                 | -                   | -                  | 0.0                      | 0.0           | 0.0             | 0.0            | 2.3               | 0.0               | 0.1                  | 7.3           | 0.0             | 0.1               | 0.2                 | 0.1                |     |
| 23271                |        | C                                                                                                                             | -                      | A             | -               | -              | -                 | A                 | A                    | A             | -               | -                 | A                   | A                  | 0.2                      | 15.7          | 20.0            | 44.2           | 4.2               | 0.0               | 0.1                  | 5.1           | 0.0             | 0.3               | 0.2                 | 0.2                |     |
| 23277                |        | C                                                                                                                             | -                      | -             | -               | -              | -                 | -                 | -                    | -             | -               | -                 | -                   | -                  | 0.0                      | 0.0           | 0.0             | 0.0            | 7.9               | 0.0               | 0.2                  | 0.2           | 0.0             | 0.2               | 0.1                 | 0.3                |     |
| 23403                |        | A                                                                                                                             | G                      | G             | G               | G              | G                 | G                 | G                    | G             | G               | G                 | G                   | G                  | 0.2                      | 0.0           | 0.0             | 0.0            | 17.4              | 0.1               | 0.0                  | 0.1           | 0.1             | 0.0               | 0.1                 | 0.2                |     |
| 23415                |        | C                                                                                                                             | -                      | -             | -               | -              | -                 | -                 | -                    | -             | -               | -                 | -                   | -                  | 0.1                      | 0.0           | 0.0             | 0.0            | 3.6               | 1.3               | 14.0                 | 0.2           | 0.0             | 0.1               | 0.1                 | 0.2                |     |
| 23525                | M      | C                                                                                                                             | -                      | -             | -               | -              | -                 | -                 | -                    | -             | -               | -                 | -                   | -                  | 0.0                      | 0.0           | 0.0             | 0.0            | 2.4               | 0.0               | 0.0                  | 0.1           | 0.1             | 0.0               | 0.2                 | 0.2                |     |
| 23598                |        | A                                                                                                                             | -                      | -             | -               | -              | -                 | -                 | -                    | -             | -               | -                 | -                   | -                  | 0.1                      | 0.0           | 0.1             | 0.0            | 1.6               | 0.0               | 0.1                  | 49.0          | 0.1             | 0.8               | 0.4                 | 0.0                |     |
| 23604                |        | C                                                                                                                             | -                      | A             | -               | -              | -                 | A                 | A                    | A             | A               | -                 | A                   | A                  | 0.1                      | 24.8          | 25.6            | 37.8           | 6.0               | 0.0               | 0.1                  | 32.7          | 0.0             | 0.9               | 0.6                 | 0.2                |     |
| 23709                |        | C                                                                                                                             | -                      | -             | -               | -              | -                 | U                 | U                    | U             | -               | -                 | U                   | U                  | 0.1                      | 27.5          | 28.1            | 37.8           | 7.8               | 0.0               | 0.1                  | 3.5           | 0.1             | 0.1               | 0.1                 | 0.1                |     |
| 23948                |        | G                                                                                                                             | -                      | -             | -               | -              | -                 | -                 | -                    | -             | -               | -                 | -                   | -                  | 0.0                      | 36.9          | 37.9            | 29.0           | 2.2               | 0.0               | 0.2                  | 4.1           | 0.0             | 0.0               | 0.3                 | 0.4                |     |
| 24023                |        | C                                                                                                                             | -                      | -             | -               | -              | -                 | -                 | -                    | -             | -               | -                 | -                   | -                  | 0.0                      | 43.5          | 43.5            | 27.4           | 2.0               | 0.0               | 0.4                  | 5.7           | 0.3             | 0.2               | 0.2                 | 0.7                |     |
| 24506                |        | U                                                                                                                             | -                      | G             | -               | -              | -                 | G                 | G                    | G             | G               | -                 | -                   | G                  | G                        | 0.0           | 31.2            | 25.0           | 31.9              | 17.7              | 0.0                  | 0.1           | 3.2             | 0.1               | 0.0                 | 0.1                | 0.1 |
| 24914                |        | G                                                                                                                             | -                      | C             | -               | -              | -                 | C                 | C                    | C             | C               | -                 | -                   | C                  | C                        | 0.0           | 11.6            | 24.7           | 43.9              | 18.7              | 0.0                  | 0.1           | 4.4             | 0.0               | 0.0                 | 0.2                | 0.1 |
| 25460                |        | C                                                                                                                             | -                      | -             | -               | -              | -                 | -                 | -                    | -             | -               | -                 | -                   | -                  | 0.2                      | 0.1           | 49.6            | 12.9           | 26.2              | 0.0               | 0.3                  | 0.2           | 0.3             | 0.1               | 0.2                 | 0.1                |     |
| 25515                |        | C                                                                                                                             | -                      | -             | -               | -              | -                 | -                 | A                    | -             | -               | -                 | -                   | -                  | 0.0                      | 0.0           | 29.4            | 31.9           | 37.6              | 0.1               | 0.3                  | 0.0           | 0.0             | 0.1               | 0.2                 | 0.2                |     |
| 25517                | ORF 3a | C                                                                                                                             | -                      | -             | -               | -              | -                 | -                 | -                    | -             | -               | -                 | -                   | -                  | 0.1                      | 0.0           | 0.0             | 0.1            | 9.9               | 0.0               | 37.0                 | 0.1           | 0.0             | 0.2               | 0.1                 | 0.1                |     |
| 25521                |        | C                                                                                                                             | -                      | -             | -               | -              | -                 | -                 | -                    | -             | -               | -                 | -                   | -                  | 0.1                      | 0.1           | 0.0             | 0.1            | 3.1               | 0.1               | 27.9                 | 0.2           | 0.1             | 0.1               | 0.9                 | 0.0                |     |
| 25563                |        | G                                                                                                                             | U                      | -             | -               | -              | -                 | -                 | -                    | -             | -               | -                 | -                   | -                  | 0.0                      | 46.2          | 40.2            | 20.4           | 27.4              | 0.0               | 0.0                  | 5.6           | 0.1             | 0.3               | 0.2                 | 0.1                |     |
| 25710                |        | C                                                                                                                             | U                      | -             | -               | -              | -                 | -                 | -                    | -             | -               | -                 | -                   | -                  | 0.1                      | 42.2          | 34.4            | 17.6           | 26.0              | 0.0               | 0.1                  | 7.4           | 0.1             | 0.0               | 0.3                 | 0.0                |     |
| 26204                |        | C                                                                                                                             | -                      | -             | -               | -              | -                 | -                 | -                    | -             | -               | -                 | -                   | -                  | 0.0                      | 23.5          | 42.9            | 25.9           | 28.1              | 0.0               | 0.0                  | 3.7           | 23.0            | 10.6              | 0.0                 | 0.0                |     |
| 26681                |        | C                                                                                                                             | -                      | -             | -               | -              | -                 | -                 | -                    | -             | -               | -                 | -                   | -                  | 3.1                      | 0.1           | 0.0             | 0.1            | 6.2               | 49.1              | 0.3                  | 0.2           | 0.1             | 0.1               | 0.0                 | 0.2                |     |
| 26735                |        | C                                                                                                                             | U                      | -             | -               | -              | -                 | -                 | -                    | -             | -               | -                 | -                   | -                  | 0.0                      | 37.9          | 43.5            | 9.1            | 8.6               | 0.0               | 19.6                 | 17.0          | 0.0             | 0.1               | 0.3                 | 0.2                |     |
| 26819                | M      | C                                                                                                                             | -                      | -             | -               | -              | -                 | -                 | -                    | -             | -               | -                 | -                   | -                  | 0.1                      | 0.0           | 0.0             | 0.0            | 35.4              | 0.1               | 0.0                  | 0             |                 |                   |                     |                    |     |

| Nucleotide positions | Nasopharyngeal samples |               |                 |                |                   |                   |                     | Culture supernatants |                 |                   |                     |                    |
|----------------------|------------------------|---------------|-----------------|----------------|-------------------|-------------------|---------------------|----------------------|-----------------|-------------------|---------------------|--------------------|
|                      | September 18th, 2020   | May 5th, 2021 | June 21st, 2021 | July 5th, 2021 | August 12th, 2021 | October 1st, 2021 | November 24th, 2021 | May 5th, 2021        | June 14th, 2021 | August 13th, 2021 | November 24th, 2021 | December 2nd, 2021 |
| 241                  | 2150                   | 352           | 3               | 1704           | 20886             | 164               | 1666                | 590                  | 1037            | 601               | 134                 | 826                |
| 629                  | 994                    | 573           | 121             | 1725           | 15751             | 960               | 793                 | 1639                 | 1204            | 1004              | 1333                | 2036               |
| 696                  | 3494                   | 3506          | 3644            | 3332           | 67497             | 2441              | 2681                | 2199                 | 2210            | 1457              | 1499                | 2574               |
| 913                  | 2521                   | 2860          | 3041            | 2330           | 51997             | 1753              | 2001                | 1205                 | 1600            | 828               | 760                 | 1455               |
| 981                  | 3342                   | 3018          | 3306            | 2933           | 111794            | 2344              | 2404                | 2416                 | 1979            | 1514              | 1651                | 2601               |
| 1192                 | 837                    | 812           | 668             | 1499           | 59773             | 1396              | 736                 | 1963                 | 1374            | 1402              | 1612                | 1952               |
| 1677                 | 1055                   | 123           | 236             | 943            | 129526            | 673               | 646                 | 1717                 | 1372            | 1169              | 1202                | 1635               |
| 1683                 | 1056                   | 121           | 236             | 973            | 129521            | 680               | 681                 | 1690                 | 1368            | 1171              | 1172                | 1635               |
| 1895                 | 3856                   | 128           | 229             | 802            | 163711            | 96                | 155                 | 377                  | 249             | 209               | 191                 | 376                |
| 1978                 | 2898                   | 266           | 70              | 316            | 38991             | 102               | 1250                | 1469                 | 2128            | 1160              | 432                 | 1490               |
| 2509                 | 1618                   | 146           | 326             | 508            | 6193              | 91                | 122                 | 259                  | 197             | 197               | 178                 | 269                |
| 2594                 | 663                    | 242           | 23              | 391            | 14494             | 199               | 1235                | 1657                 | 2040            | 1210              | 558                 | 2141               |
| 2706                 | 665                    | 243           | 20              | 442            | 14618             | 221               | 1435                | 1767                 | 1933            | 1349              | 609                 | 2476               |
| 3037                 | 694                    | 395           | 230             | 569            | 53                | 722               | 854                 | 1515                 | 938             | 1119              | 1345                | 1603               |
| 3193                 | 1410                   | 1795          | 1891            | 1329           | 33319             | 231               | 582                 | 342                  | 455             | 189               | 211                 | 361                |
| 3224                 | 736                    | 1925          | 1985            | 1550           | 33479             | 866               | 1704                | 980                  | 1360            | 681               | 680                 | 967                |
| 3267                 | 735                    | 2002          | 1946            | 1312           | 33223             | 1073              | 1840                | 1024                 | 1520            | 562               | 788                 | 1049               |
| 3340                 | 734                    | 2127          | 2112            | 1698           | 32456             | 1510              | 2003                | 1122                 | 1705            | 836               | 712                 | 1142               |
| 3393                 | 731                    | 1696          | 1624            | 1333           | 32139             | 1136              | 1586                | 865                  | 1291            | 602               | 590                 | 855                |
| 4543                 | 3340                   | 489           | 7               | 1275           | 304941            | 247               | 1546                | 1516                 | 1733            | 1069              | 441                 | 953                |
| 4872                 | 1522                   | 76            | 8               | 143            | 4024              | 212               | 669                 | 2538                 | 1645            | 1127              | 1153                | 3332               |
| 4878                 | 1521                   | 72            | 7               | 118            | 4012              | 179               | 610                 | 2453                 | 1591            | 1056              | 1051                | 3188               |
| 4893                 | 1520                   | 91            | 11              | 127            | 3991              | 178               | 602                 | 2458                 | 1649            | 1023              | 1088                | 3348               |
| 4904                 | 1520                   | 95            | 10              | 117            | 3986              | 145               | 535                 | 2329                 | 1682            | 926               | 976                 | 3274               |
| 5278                 | 850                    | 828           | 92              | 343            | 718               | 67                | 151                 | 169                  | 241             | 78                | 71                  | 192                |
| 5629                 | 1774                   | 799           | 189             | 1765           | 51104             | 164               | 617                 | 389                  | 472             | 212               | 42                  | 388                |
| 5648                 | 1181                   | 797           | 189             | 1850           | 51155             | 486               | 1860                | 1017                 | 1553            | 703               | 374                 | 1190               |
| 5986                 | 571                    | 149           | 224             | 199            | 913               | 383               | 528                 | 1207                 | 849             | 940               | 1075                | 1349               |
| 6629                 | 1811                   | 410           | 284             | 699            | 162979            | 893               | 857                 | 1394                 | 747             | 961               | 1139                | 1593               |
| 6633                 | 1811                   | 425           | 302             | 733            | 163229            | 937               | 902                 | 1457                 | 816             | 1005              | 1204                | 1635               |
| 7113                 | 1974                   | 30            | 0               | 95             | 288760            | 6                 | 194                 | 415                  | 297             | 313               | 170                 | 473                |
| 7185                 | 1653                   | 8             | 2               | 68             | 284759            | 15                | 578                 | 1427                 | 810             | 980               | 592                 | 1433               |
| 7279                 | 1653                   | 15            | 6               | 110            | 285215            | 18                | 770                 | 1630                 | 1162            | 1312              | 860                 | 1701               |
| 8191                 | 2290                   | 1560          | 928             | 1493           | 177777            | 1106              | 1893                | 1083                 | 1614            | 807               | 824                 | 1146               |
| 8770                 | 1971                   | 108           | 2               | 454            | 153168            | 28                | 1543                | 1035                 | 1537            | 900               | 325                 | 1076               |
| 8950                 | 2911                   | 1251          | 1238            | 2031           | 259162            | 1318              | 1912                | 2233                 | 1550            | 1597              | 1349                | 2443               |
| 9042                 | 963                    | 840           | 955             | 1326           | 107695            | 1244              | 778                 | 1495                 | 884             | 956               | 1258                | 1906               |
| 9120                 | 961                    | 1099          | 1287            | 1677           | 106579            | 1590              | 983                 | 1786                 | 1287            | 1187              | 1539                | 2316               |
| 9501                 | 1692                   | 87            | 0               | 322            | 4013              | 23                | 516                 | 358                  | 688             | 266               | 52                  | 267                |
| 9526                 | 1724                   | 186           | 1               | 491            | 4020              | 57                | 2429                | 1801                 | 1370            | 591               | 131                 | 1792               |
| 9626                 | 1488                   | 2             | 0               | 4              | 181               | 4                 | 162                 | 340                  | 1708            | 319               | 28                  | 660                |
| 9783                 | 1493                   | 6             | 0               | 2              | 1111              | 1                 | 155                 | 261                  | 1631            | 236               | 23                  | 428                |
| 9792                 | 2650                   | 6             | 1               | 2              | 22549             | 1                 | 45                  | 81                   | 504             | 57                | 5                   | 104                |
| 9811                 | 2735                   | 395           | 178             | 151            | 24543             | 173               | 718                 | 812                  | 1867            | 589               | 261                 | 987                |
| 9972                 | 1264                   | 682           | 223             | 251            | 24799             | 357               | 1396                | 870                  | 2043            | 904               | 594                 | 1175               |
| 11083                | 1784                   | 3073          | 3301            | 2742           | 114282            | 2212              | 2593                | 1758                 | 2729            | 1391              | 1087                | 1925               |
| 11208                | 1800                   | 2632          | 2754            | 2418           | 114516            | 1884              | 2563                | 1484                 | 2366            | 1089              | 925                 | 1684               |
| 11365                | 3333                   | 2531          | 2218            | 2663           | 167240            | 1993              | 3056                | 3704                 | 3270            | 2401              | 2028                | 3693               |
| 11497                | 1557                   | 285           | 7               | 695            | 54023             | 509               | 910                 | 2039                 | 1649            | 1253              | 1119                | 2203               |
| 12459                | 2225                   | 1415          | 896             | 2354           | 63912             | 1377              | 2333                | 3008                 | 1870            | 1939              | 1796                | 3089               |
| 12592                | 916                    | 438           | 688             |                | 23200             | 981               | 877                 | 1734                 | 1183            | 1405              | 1599                | 1755               |



Supplementary Figure S2b (continued)

| Nucleotide positions | Nasopharyngeal samples |               |                 |                |                   |                   |                     | Culture supernatants |                 |                   |                     |                    |
|----------------------|------------------------|---------------|-----------------|----------------|-------------------|-------------------|---------------------|----------------------|-----------------|-------------------|---------------------|--------------------|
|                      | September 18th, 2020   | May 5th, 2021 | June 21st, 2021 | July 5th, 2021 | August 12th, 2021 | October 1st, 2021 | November 24th, 2021 | May 5th, 2021        | June 14th, 2021 | August 13th, 2021 | November 24th, 2021 | December 2nd, 2021 |
| 13506                | 751                    | 19            | 8               | 79             | 7784              | 6                 | 763                 | 2084                 | 2239            | 1345              | 433                 | 2188               |
| 13517                | 751                    | 26            | 8               | 98             | 7798              | 6                 | 857                 | 2324                 | 2535            | 1517              | 479                 | 2448               |
| 13860                | 2406                   | 693           | 1098            | 1297           | 20082             | 869               | 913                 | 2767                 | 1799            | 1537              | 1948                | 2481               |
| 13936                | 5135                   | 969           | 1413            | 1387           | 160834            | 385               | 430                 | 920                  | 601             | 570               | 626                 | 886                |
| 13993                | 2826                   | 1931          | 1232            | 1485           | 143197            | 1240              | 2017                | 2074                 | 1456            | 743               | 510                 | 1177               |
| 14408                | 320                    | 876           | 155             | 1628           | 21272             | 1343              | 844                 | 1654                 | 1575            | 1176              | 1243                | 1774               |
| 15766                | 1689                   | 1008          | 1839            | 1791           | 47916             | 1480              | 840                 | 1480                 | 1395            | 1162              | 1463                | 1717               |
| 16128                | 3156                   | 3403          | 2881            | 2744           | 57062             | 687               | 703                 | 501                  | 650             | 342               | 153                 | 554                |
| 16675                | 811                    | 818           | 448             | 455            | 31287             | 727               | 1562                | 901                  | 1055            | 423               | 386                 | 1129               |
| 16751                | 1830                   | 978           | 569             | 546            | 31093             | 276               | 525                 | 297                  | 429             | 149               | 154                 | 369                |
| 16889                | 1236                   | 209           | 12              | 292            | 233               | 509               | 1206                | 2272                 | 1850            | 1715              | 1421                | 2741               |
| 17019                | 1237                   | 137           | 19              | 175            | 225               | 324               | 791                 | 1510                 | 1304            | 1017              | 849                 | 1838               |
| 17122                | 3716                   | 2711          | 1588            | 2183           | 68134             | 1562              | 3401                | 2728                 | 2586            | 1595              | 1649                | 3410               |
| 17125                | 3716                   | 2527          | 1485            | 2054           | 68137             | 1435              | 3221                | 2496                 | 2440            | 1420              | 1535                | 3126               |
| 17251                | 2512                   | 2303          | 1468            | 2283           | 69806             | 1686              | 2221                | 1252                 | 1783            | 992               | 1046                | 1468               |
| 17721                | 2530                   | 1170          | 552             | 2074           | 31757             | 862               | 2288                | 2056                 | 1719            | 1380              | 1121                | 1972               |
| 17738                | 2522                   | 947           | 408             | 1750           | 31777             | 598               | 1874                | 1541                 | 1415            | 1068              | 697                 | 1447               |
| 18023                | 2671                   | 1143          | 1496            | 2294           | 109388            | 1253              | 2310                | 2414                 | 1877            | 1614              | 1632                | 2330               |
| 18877                | 1328                   | 1598          | 2688            | 2248           | 62018             | 2114              | 1310                | 1911                 | 1848            | 1464              | 1872                | 2269               |
| 19186                | 1445                   | 1670          | 1687            | 1462           | 37080             | 1031              | 1504                | 926                  | 1445            | 656               | 604                 | 956                |
| 19547                | 14                     | 97            | 78              | 40             | 81                | 124               | 251                 | 628                  | 396             | 508               | 482                 | 861                |
| 19947                | 148                    | 71            | 19              | 224            | 392               | 58                | 519                 | 1174                 | 870             | 1040              | 648                 | 1478               |
| 20930                | 409                    | 2758          | 2087            | 2111           | 7742              | 1685              | 1855                | 1222                 | 2118            | 989               | 831                 | 1493               |
| 21219                | 157                    | 23            | 127             | 26             | 8                 | 93                | 396                 | 692                  | 1130            | 873               | 529                 | 1483               |
| 21232                | 157                    | 25            | 132             | 29             | 7                 | 104               | 400                 | 690                  | 1091            | 884               | 530                 | 1457               |
| 21575                | 221                    | 363           | 132             | 132            | 3101              | 294               | 580                 | 271                  | 914             | 518               | 288                 | 817                |
| 21765                | 2025                   | 756           | 1110            | 1045           | 3515              | 702               | 571                 | 1409                 | 1242            | 624               | 800                 | 1091               |
| 21766                | 2025                   | 717           | 1076            | 925            | 3513              | 552               | 445                 | 1426                 | 1272            | 494               | 630                 | 869                |
| 21767                | 2024                   | 723           | 1090            | 934            | 3513              | 543               | 440                 | 1461                 | 1304            | 488               | 621                 | 861                |
| 21768                | 2024                   | 721           | 1075            | 929            | 3513              | 543               | 440                 | 1454                 | 1267            | 488               | 621                 | 861                |
| 21769                | 2024                   | 711           | 1045            | 915            | 3513              | 544               | 441                 | 1414                 | 1223            | 489               | 623                 | 863                |
| 21770                | 2024                   | 710           | 1035            | 933            | 3513              | 575               | 466                 | 1370                 | 1165            | 526               | 677                 | 919                |

Supplementary Figure S2b (continued)

| Nucleotide position | Nasopharyngeal samples |               |                 |                |                   |                   |                     | Culture supernatants |                 |                   |                     |                    |
|---------------------|------------------------|---------------|-----------------|----------------|-------------------|-------------------|---------------------|----------------------|-----------------|-------------------|---------------------|--------------------|
|                     | September 18th, 2020   | May 5th, 2021 | June 21st, 2021 | July 5th, 2021 | August 12th, 2021 | October 1st, 2021 | November 24th, 2021 | May 5th, 2021        | June 14th, 2021 | August 13th, 2021 | November 24th, 2021 | December 2nd, 2021 |
| 21991               | 3898                   | 1347          | 1126            | 1191           | 11092             | 80                | 70                  | 1573                 | 96              | 80                | 106                 | 144                |
| 21992               | 3900                   | 1346          | 1121            | 1185           | 11090             | 80                | 71                  | 1578                 | 96              | 80                | 106                 | 145                |
| 21993               | 3900                   | 1338          | 1117            | 1176           | 11088             | 82                | 74                  | 1583                 | 104             | 81                | 107                 | 151                |
| 22992               | 1241                   | 9             | 0               | 175            | 151073            | 12                | 186                 | 980                  | 1363            | 997               | 95                  | 673                |
| 23063               | 1226                   | 16            | 3               | 214            | 150290            | 7                 | 243                 | 1142                 | 1610            | 1029              | 116                 | 776                |
| 23188               | 3006                   | 2370          | 2725            | 2115           | 165844            | 1184              | 1572                | 1338                 | 1947            | 1026              | 481                 | 1333               |
| 23271               | 1840                   | 2849          | 3112            | 2196           | 19307             | 1490              | 1827                | 1063                 | 2417            | 706               | 601                 | 1437               |
| 23277               | 1840                   | 2957          | 3275            | 2345           | 19312             | 1631              | 1980                | 1151                 | 2603            | 831               | 681                 | 1571               |
| 23403               | 1837                   | 2753          | 3033            | 2309           | 20084             | 1749              | 1974                | 1168                 | 2358            | 921               | 714                 | 1643               |
| 23415               | 1834                   | 2889          | 3168            | 2442           | 20072             | 1869              | 2098                | 1254                 | 2544            | 986               | 767                 | 1754               |
| 23525               | 782                    | 726           | 1039            | 1136           | 1106              | 956               | 860                 | 1377                 | 1761            | 1102              | 1060                | 1929               |
| 23598               | 784                    | 787           | 1096            | 1200           | 689               | 988               | 977                 | 202                  | 1647            | 1185              | 1185                | 2070               |
| 23604               | 784                    | 828           | 1135            | 1228           | 689               | 995               | 976                 | 107                  | 1702            | 1192              | 1162                | 2071               |
| 23709               | 783                    | 703           | 957             | 996            | 688               | 778               | 868                 | 1384                 | 1387            | 862               | 921                 | 1605               |
| 23948               | 2775                   | 352           | 243             | 434            | 51870             | 216               | 998                 | 660                  | 955             | 397               | 221                 | 529                |
| 24023               | 2776                   | 469           | 308             | 478            | 51684             | 280               | 1282                | 724                  | 1216            | 566               | 304                 | 722                |
| 24506               | 1061                   | 1248          | 336             | 993            | 40365             | 660               | 1497                | 793                  | 1485            | 562               | 566                 | 1000               |
| 24914               | 953                    | 1286          | 2252            | 2139           | 56056             | 1706              | 1017                | 1808                 | 1896            | 1247              | 1577                | 2169               |
| 25460               | 942                    | 787           | 1402            | 1411           | 109844            | 1314              | 794                 | 2225                 | 1764            | 1233              | 1424                | 1744               |
| 25515               | 942                    | 774           | 1492            | 1357           | 109838            | 1229              | 910                 | 2476                 | 1803            | 1411              | 1331                | 1895               |
| 25517               | 942                    | 744           | 1477            | 1346           | 109841            | 1159              | 903                 | 2407                 | 1680            | 1324              | 1281                | 1812               |
| 25521               | 942                    | 753           | 1386            | 1246           | 109845            | 1121              | 904                 | 2390                 | 1679            | 1313              | 1262                | 1783               |
| 25563               | 942                    | 604           | 1079            | 1096           | 109851            | 1004              | 684                 | 2107                 | 1299            | 899               | 1122                | 1489               |
| 25710               | 1647                   | 351           | 131             | 493            | 58375             | 369               | 1455                | 2327                 | 1623            | 826               | 565                 | 1447               |
| 26204               | 1014                   | 221           | 35              | 239            | 22478             | 87                | 215                 | 652                  | 453             | 179               | 391                 | 633                |
| 26681               | 977                    | 1114          | 950             | 1537           | 1767              | 1408              | 1001                | 2401                 | 2245            | 1384              | 1753                | 3572               |
| 26735               | 979                    | 1201          | 1084            | 1729           | 1804              | 1681              | 1125                | 2807                 | 2065            | 1327              | 1686                | 4015               |
| 26819               | 979                    | 1224          | 1103            | 1428           | 5035              | 1482              | 1097                | 2895                 | 2426            | 1402              | 1725                | 4763               |
| 26835               | 991                    | 1301          | 1184            | 1407           | 5549              | 1238              | 1063                | 2756                 | 2116            | 1243              | 1538                | 4249               |
| 26858               | 2548                   | 1491          | 1290            | 1574           | 32691             | 308               | 405                 | 1066                 | 555             | 395               | 459                 | 1141               |
| 26876               | 2553                   | 1214          | 1042            | 1322           | 32927             | 1149              | 1834                | 4224                 | 2713            | 1901              | 1484                | 3997               |
| 26907               | 2347                   | 233           | 43              | 247            | 32445             | 10                | 299                 | 864                  | 631             | 336               | 120                 | 707                |
| 26952               | 1594                   | 222           | 45              | 282            | 31569             | 33                | 911                 | 3053                 | 2445            | 1381              | 409                 | 3308               |
| 27459               | 1380                   | 1048          | 1563            | 1661           | 114777            | 361               | 262                 | 761                  | 498             | 344               | 431                 | 820                |
| 27918               | 383                    | 618           | 630             | 254            | 133               | 14                | 8                   | 1189                 | 1151            | 771               | 14                  | 20                 |
| 28038               | 383                    | 774           | 915             | 362            | 135               | 27                | 22                  | 1690                 | 1456            | 1007              | 41                  | 56                 |
| 28271               | 1896                   | 2572          | 3143            | 2135           | 92933             | 1762              | 1829                | 1473                 | 1720            | 760               | 647                 | 1217               |
| 28338               | 1894                   | 3302          | 3787            | 2615           | 92839             | 2051              | 2050                | 1563                 | 2017            | 925               | 876                 | 1423               |
| 28560               | 179                    | 829           | 1450            | 1667           | 12470             | 1260              | 798                 | 2017                 | 1535            | 1200              | 1277                | 2103               |
| 28572               | 179                    | 907           | 1533            | 1789           | 12474             | 1368              | 1003                | 2162                 | 1653            | 1295              | 1390                | 2429               |
| 28657               | 179                    | 1106          | 1816            | 2053           | 12462             | 1579              | 1057                | 2834                 | 2155            | 1644              | 1663                | 3113               |
| 28887               | 1241                   | 827           | 66              | 212            | 7521              | 222               | 956                 | 2372                 | 2567            | 1083              | 555                 | 2506               |
| 28975               | 1241                   | 808           | 41              | 139            | 7558              | 151               | 888                 | 2328                 | 1816            | 754               | 382                 | 2595               |
| 28977               | 1241                   | 548           | 40              | 127            | 7569              | 141               | 841                 | 2227                 | 1672            | 704               | 354                 | 2478               |
| 29242               | 1366                   | 771           | 461             | 1371           | 48806             | 766               | 838                 | 2431                 | 1909            | 1475              | 1265                | 2651               |
| 29399               | 359                    | 1382          | 172             | 329            | 5301              | 593               | 853                 | 1056                 | 1414            | 687               | 501                 | 1073               |
| 29445               | 360                    | 1429          | 133             | 339            | 5326              | 494               | 749                 | 927                  | 1166            | 548               | 425                 | 908                |
| 29743               | 385                    | 450           | 128             | 298            | 4362              | 483               | 624                 | 1312                 | 940             | 1035              | 765                 | 1412               |

Supplementary Figure S3. Detailed content of amplicons corresponding to positions 3,100-4,570 of the SARS-CoV-2 genome and retrieved from respiratory samples collected on May 5<sup>th</sup>, 2021. Amplicons were first sorted in order to keep continuous reads for analysis. The number and percentage of each type of reads are indicated. B.1.160 variant regions are indicated by a blue color; Alpha variant regions are indicated by a green color; patient-specific mutations are indicated by a red color. Reads were visualized using the IGV software [3].

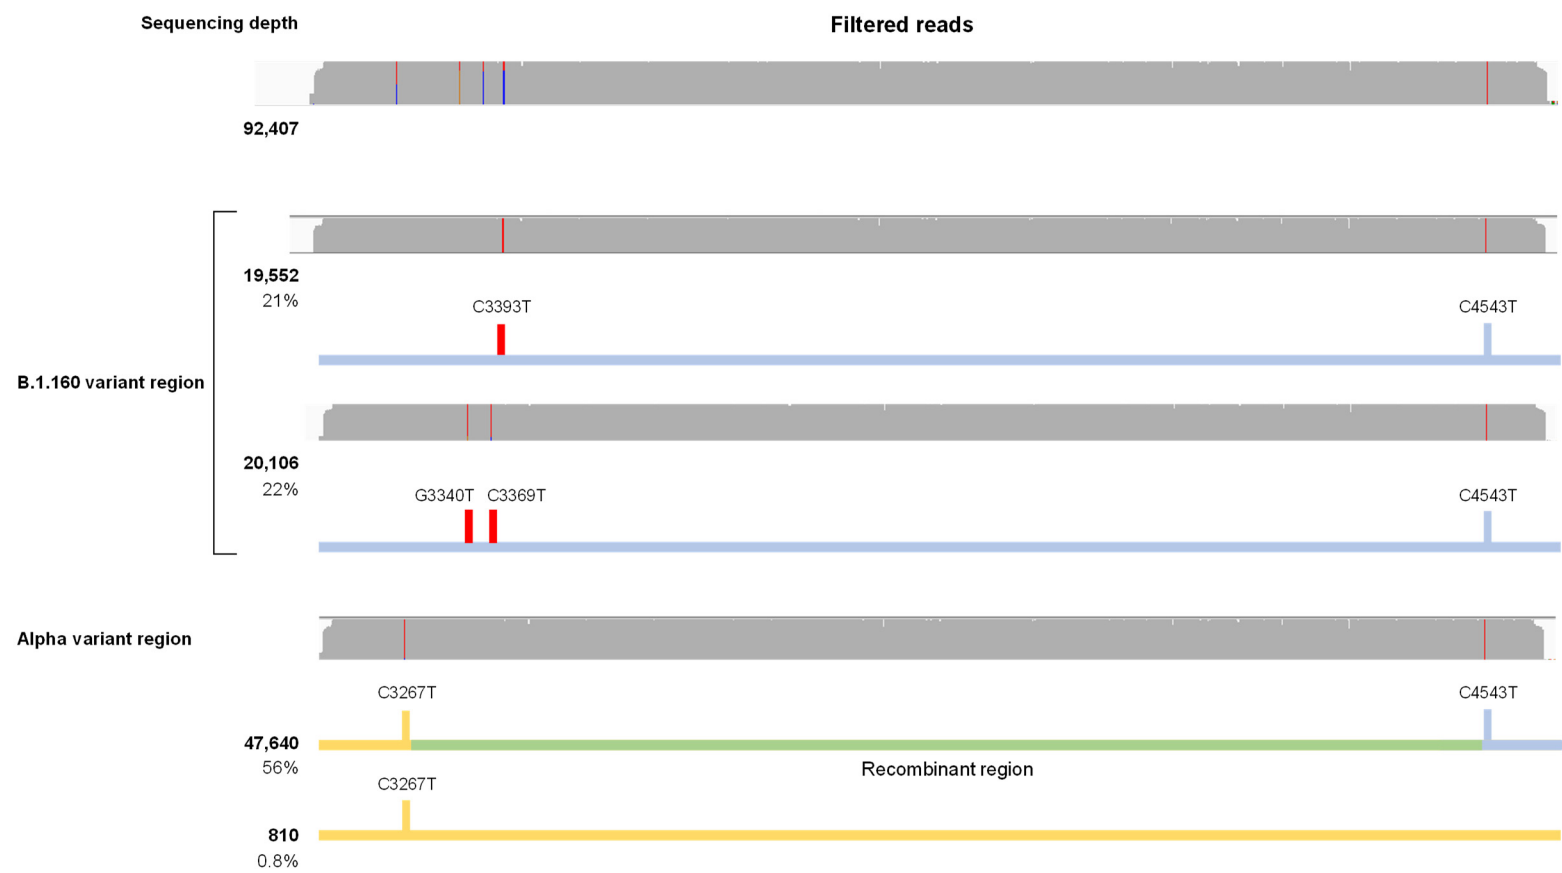

Supplementary Figure S4. Detailed content of amplicons corresponding to positions 3,100-4,570 of the SARS-CoV-2 genome and retrieved from respiratory samples collected on August 12<sup>th</sup>, 2021. Amplicons were first sorted in order to keep continuous reads for analysis. The number and percentage of each type of reads are indicated. B.1.160 variant regions are indicated by a blue color; Alpha variant regions are indicated by a green color; patient-specific mutations are indicated by a red color. Reads were visualized using the IGV software [3].

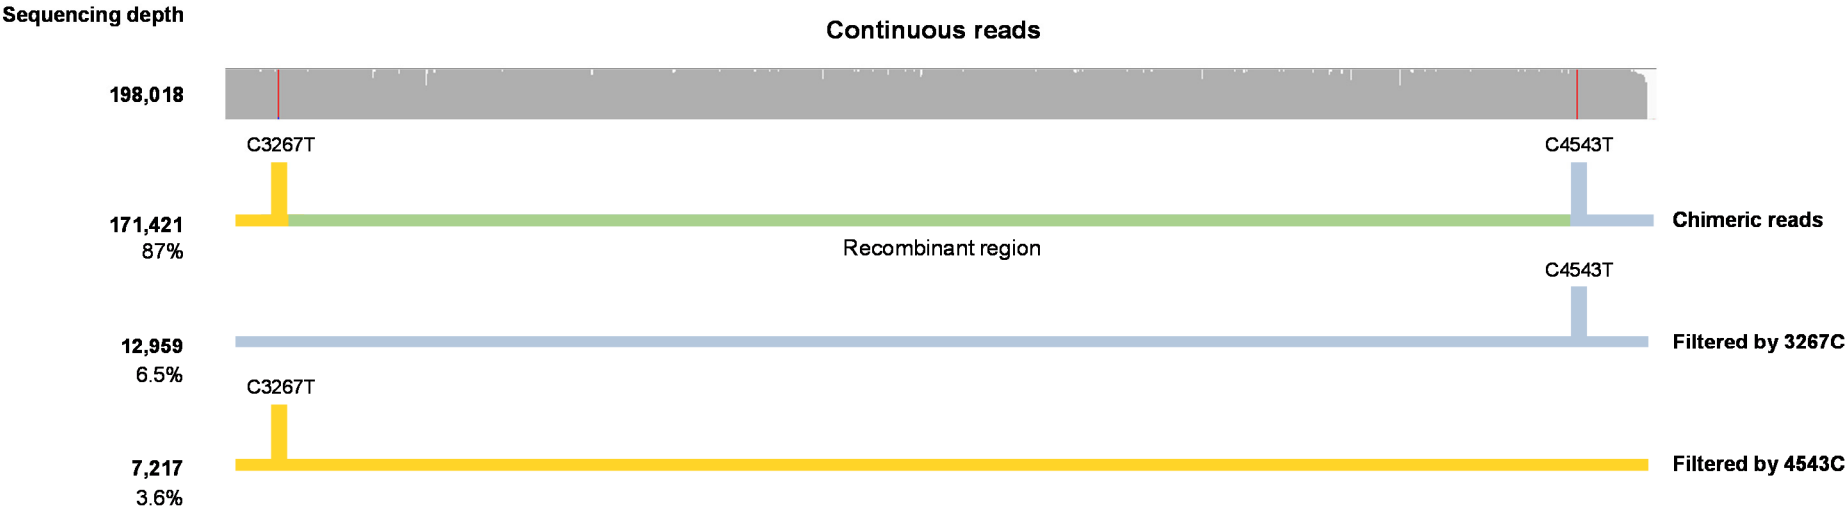

Supplementary Figure S5. Detailed content of amplicons corresponding to positions 24,880-29,010 of the SARS-CoV-2 genome and retrieved from respiratory samples collected on August 12<sup>th</sup>, 2021. Amplicons were first sorted in order to keep continuous reads for analysis. The number and percentage of each type of reads are indicated. B.1.160 variant regions are indicated by a blue color; Alpha variant regions are indicated by a green color; patient-specific mutations are indicated by a red color. Reads were visualized using the IGV software [3].

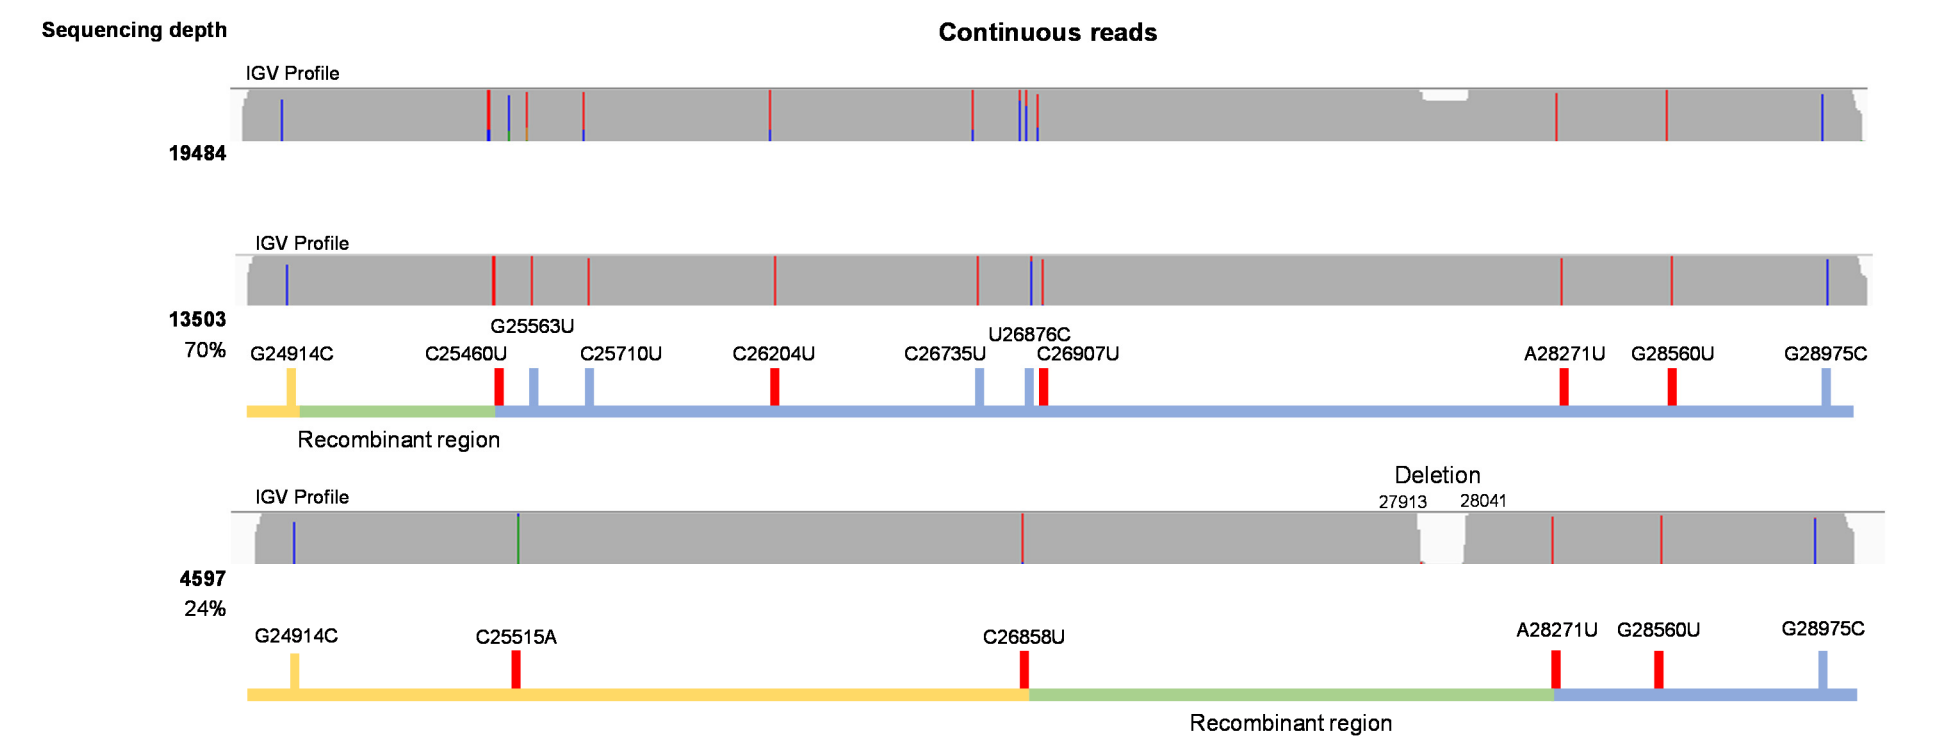

---

#### 4. SUPPLEMENTARY TABLES

*Supplementary Table S1. List of GISAID identifiers for sequences used in the present study.*

All genomes were obtained in our laboratory (University hospital institute Méditerranée Infection, Marseille, France). The GISAID sequence database is accessible at: (<https://www.gisaid.org/>) [4].

| Source sample                            | GISAID identifier |
|------------------------------------------|-------------------|
| Respiratory samples                      |                   |
| Case-patient's sequences                 | EPI_ISL_10816731  |
|                                          | EPI_ISL_10816733  |
|                                          | EPI_ISL_10816742  |
|                                          | EPI_ISL_10816743  |
|                                          | EPI_ISL_10816744  |
|                                          | EPI_ISL_11030507  |
|                                          | EPI_ISL_6332079   |
| Most similar sequences from our database | EPI_ISL_10816729  |
|                                          | EPI_ISL_10816740  |
|                                          | EPI_ISL_2757096   |
|                                          | EPI_ISL_3054898   |
|                                          | EPI_ISL_3054899   |
|                                          | EPI_ISL_3055037   |
|                                          | EPI_ISL_3055223   |
|                                          | EPI_ISL_3055225   |
|                                          | EPI_ISL_3055227   |
|                                          | EPI_ISL_3055234   |
|                                          | EPI_ISL_3055235   |
|                                          | EPI_ISL_3830105   |
|                                          | EPI_ISL_3830215   |
|                                          | EPI_ISL_3831874   |
|                                          | EPI_ISL_3933559   |
|                                          | EPI_ISL_3933565   |
|                                          | EPI_ISL_3933569   |
|                                          | EPI_ISL_3933571   |
|                                          | EPI_ISL_3933572   |
|                                          | EPI_ISL_3934656   |
|                                          | EPI_ISL_3934682   |
|                                          | EPI_ISL_3934683   |
|                                          | EPI_ISL_4394365   |
|                                          | EPI_ISL_4944362   |
|                                          | EPI_ISL_4944364   |
|                                          | EPI_ISL_4951784   |
|                                          | EPI_ISL_4951785   |
|                                          | EPI_ISL_6737742   |
|                                          | EPI_ISL_7376142   |
|                                          | EPI_ISL_7376355   |

---

---

*Supplementary Table S1 - continued*

|                          |                  |
|--------------------------|------------------|
|                          | EPI_ISL_8321213  |
|                          | EPI_ISL_8321223  |
|                          | EPI_ISL_8321228  |
|                          | EPI_ISL_8321229  |
|                          | EPI_ISL_8321241  |
|                          | EPI_ISL_8321242  |
|                          | EPI_ISL_8321256  |
|                          | EPI_ISL_8709907  |
|                          | EPI_ISL_8709910  |
|                          | EPI_ISL_8711731  |
|                          | EPI_ISL_9773781  |
|                          | EPI_ISL_9774389  |
|                          | EPI_ISL_9774894  |
|                          | EPI_ISL_9774895  |
| Culture supernatants     |                  |
| Case-patient's sequences | EPI_ISL_10816730 |
|                          | EPI_ISL_10816732 |
|                          | EPI_ISL_10816734 |
|                          | EPI_ISL_10816735 |
|                          | EPI_ISL_10816738 |

---

---

*Supplementary Table S2. Sampling time and location for sequences used in the present study.*

| GISAID identifier | Date       | Location                                                 |
|-------------------|------------|----------------------------------------------------------|
| EPI_ISL_3830215   | 2021-03    | Europe / France / Provence-Alpes-Cote d'Azur / Marseille |
| EPI_ISL_10816729  | 2020-11    | Europe / France / Provence-Alpes-Cote d'Azur / Marseille |
| EPI_ISL_10816740  | 2021-03    | Europe / France / Provence-Alpes-Cote d'Azur / Marseille |
| EPI_ISL_10816741  | 2021-11    | Europe / France / Provence-Alpes-Cote d'Azur / Marseille |
| EPI_ISL_2757096   | 2020-11-07 | Europe / France / Provence-Alpes-Cote d'Azur / Marseille |
| EPI_ISL_3054898   | 2020-09-11 | Europe / France / Provence-Alpes-Cote d'Azur / Marseille |
| EPI_ISL_3054899   | 2020-09-14 | Europe / France / Provence-Alpes-Cote d'Azur / Marseille |
| EPI_ISL_3055037   | 2020-09-12 | Europe / France / Provence-Alpes-Cote d'Azur / Marseille |
| EPI_ISL_3055223   | 2020-09-15 | Europe / France / Provence-Alpes-Cote d'Azur / Marseille |
| EPI_ISL_3055225   | 2020-09-15 | Europe / France / Provence-Alpes-Cote d'Azur / Marseille |
| EPI_ISL_3055227   | 2020-09-15 | Europe / France / Provence-Alpes-Cote d'Azur / Marseille |
| EPI_ISL_3055234   | 2020-09-17 | Europe / France / Provence-Alpes-Cote d'Azur / Marseille |
| EPI_ISL_3055235   | 2020-09-17 | Europe / France / Provence-Alpes-Cote d'Azur / Marseille |
| EPI_ISL_3830105   | 2021-03    | Europe / France / Provence-Alpes-Cote d'Azur / Marseille |
| EPI_ISL_3831874   | 2020-08    | Europe / France / Provence-Alpes-Cote d'Azur / Marseille |
| EPI_ISL_3933559   | 2020-11    | Europe / France / Provence-Alpes-Cote d'Azur / Marseille |
| EPI_ISL_3933565   | 2020-09    | Europe / France / Provence-Alpes-Cote d'Azur / Marseille |
| EPI_ISL_3933569   | 2020-08    | Europe / France / Provence-Alpes-Cote d'Azur / Marseille |
| EPI_ISL_3933571   | 2020-08    | Europe / France / Provence-Alpes-Cote d'Azur / Marseille |
| EPI_ISL_3933572   | 2020-08    | Europe / France / Provence-Alpes-Cote d'Azur / Marseille |
| EPI_ISL_3934656   | 2021-04    | Europe / France / Provence-Alpes-Cote d'Azur / Marseille |
| EPI_ISL_3934682   | 2021-04    | Europe / France / Provence-Alpes-Cote d'Azur / Marseille |
| EPI_ISL_3934683   | 2021-03    | Europe / France / Provence-Alpes-Cote d'Azur / Marseille |
| EPI_ISL_4394365   | 2021-04    | Europe / France / Provence-Alpes-Cote d'Azur / Marseille |
| EPI_ISL_4944362   | 2021-07    | Europe / France / Provence-Alpes-Cote d'Azur / Marseille |
| EPI_ISL_4944364   | 2021-07    | Europe / France / Provence-Alpes-Cote d'Azur / Marseille |
| EPI_ISL_4951784   | 2021-04    | Europe / France / Provence-Alpes-Cote d'Azur / Marseille |
| EPI_ISL_4951785   | 2021-04    | Europe / France / Provence-Alpes-Cote d'Azur / Marseille |
| EPI_ISL_6737742   | 2021-01    | Europe / France / Provence-Alpes-Cote d'Azur / Marseille |
| EPI_ISL_7376142   | 2021-01    | Europe / France / Provence-Alpes-Cote d'Azur / Marseille |
| EPI_ISL_7376355   | 2021-01    | Europe / France / Provence-Alpes-Cote d'Azur / Marseille |
| EPI_ISL_8321213   | 2020-10    | Europe / France / Provence-Alpes-Cote d'Azur / Marseille |
| EPI_ISL_8321223   | 2020-10    | Europe / France / Provence-Alpes-Cote d'Azur / Marseille |
| EPI_ISL_8321228   | 2020-10    | Europe / France / Provence-Alpes-Cote d'Azur / Marseille |
| EPI_ISL_8321229   | 2020-10    | Europe / France / Provence-Alpes-Cote d'Azur / Marseille |
| EPI_ISL_8321241   | 2020-10    | Europe / France / Provence-Alpes-Cote d'Azur / Marseille |
| EPI_ISL_8321242   | 2020-10    | Europe / France / Provence-Alpes-Cote d'Azur / Marseille |
| EPI_ISL_8321256   | 2020-10    | Europe / France / Provence-Alpes-Cote d'Azur / Marseille |
| EPI_ISL_8709907   | 2021-11    | Europe / France / Provence-Alpes-Cote d'Azur / Marseille |
| EPI_ISL_8709910   | 2022-01    | Europe / France / Provence-Alpes-Cote d'Azur / Marseille |
| EPI_ISL_8711731   | 2021-03    | Europe / France / Provence-Alpes-Cote d'Azur / Marseille |
| EPI_ISL_9773781   | 2020-03    | Europe / France / Provence-Alpes-Cote d'Azur / Marseille |
| EPI_ISL_9774389   | 2020-03    | Europe / France / Provence-Alpes-Cote d'Azur / Marseille |
| EPI_ISL_9774894   | 2021-04    | Europe / France / Provence-Alpes-Cote d'Azur / Marseille |
| EPI_ISL_9774895   | 2021-04    | Europe / France / Provence-Alpes-Cote d'Azur / Marseille |

---



Supplementary Table S3. Identifiers of raw data deposited in the European Bioinformatics Institute (EMBL-EBI) sequence database (<https://www.ebi.ac.uk/>)

a.

| Raw data EMBL-EBI identifier | GISAID identifier | Sampling date                     | Time from diagnosis<br>(days) | Next-generation sequencing<br>technology, instrument |
|------------------------------|-------------------|-----------------------------------|-------------------------------|------------------------------------------------------|
| ERR9671577                   | EPI_ISL_6332079   | September 18 <sup>th</sup> , 2020 | 0                             | Illumina, NovaSeq                                    |
| ERR9671578                   | EPI_ISL_10816743  | May 5 <sup>th</sup> , 2021        | 229                           | Illumina, NovaSeq                                    |
| ERR9671579                   | EPI_ISL_11030507  | June 21 <sup>st</sup> , 2021      | 276                           | Illumina, NovaSeq                                    |
| ERR9671580                   | EPI_ISL_10816731  | July 5 <sup>th</sup> , 2021       | 290                           | Illumina, NovaSeq                                    |
| ERR9692770                   | EPI_ISL_10816742  | August 12 <sup>th</sup> , 2021    | 328                           | Nanopore, GridION                                    |
| ERR9671581                   | EPI_ISL_10816744  | October 1 <sup>st</sup> , 2021    | 378                           | Illumina, NovaSeq                                    |
| ERR9671582                   | EPI_ISL_10816733  | November 24 <sup>th</sup> , 2021  | 432                           | Illumina, NovaSeq                                    |

b.

| Raw data EMBL-EBI identifier | GISAID identifier | Sampling date of the<br>nasopharyngeal sample | Time to cytopathic<br>effect (days) | Next-generation sequencing<br>technology, instrument |
|------------------------------|-------------------|-----------------------------------------------|-------------------------------------|------------------------------------------------------|
| ERR9671585                   | EPI_ISL_10816730  | May 5 <sup>th</sup> , 2021                    | 8                                   | Illumina, NovaSeq                                    |
| ERR9671583                   | EPI_ISL_10816732  | June 14 <sup>th</sup> , 2021                  | 4                                   | Illumina, NovaSeq                                    |
| ERR9671584                   | EPI_ISL_10816734  | August 13 <sup>th</sup> , 2021                | 4                                   | Illumina, NovaSeq                                    |
| ERR9671586                   | EPI_ISL_10816735  | November 24 <sup>th</sup> , 2021              | 5                                   | Illumina, NovaSeq                                    |
| ERR9671587                   | EPI_ISL_10816738  | December 2 <sup>nd</sup> , 2021               | 7                                   | Illumina, NovaSeq                                    |

c.

| Raw data EMBL-EBI identifier | GISAID identifier / pre-sequencing approach | Sequenced region | Sampling date                  |
|------------------------------|---------------------------------------------|------------------|--------------------------------|
| ERR9683059                   | EPI_ISL_10816742 / RT-Klenow                | Whole genome     | August 12 <sup>th</sup> , 2021 |
| ERR9683060                   | EPI_ISL_10816743 / H2                       | 3,100-4,570      | May 5 <sup>th</sup> , 2021     |
| ERR9683061                   | EPI_ISL_10816742 / H3                       | 24,813-29,074    | August 12 <sup>th</sup> , 2021 |
| ERR9738766                   | EPI_ISL_10816742 / H2                       | 3,100-4,570      | August 12 <sup>th</sup> , 2021 |

## References

1. La Scola, B.; Le Bideau, M.; Andreani, J.; et al. Viral RNA load as determined by cell culture as a management tool for discharge of SARS-CoV-2 patients from infectious disease wards. *Eur J Clin Microbiol Infect Dis*. **2020**, *39*, 1059-1061.
2. Colson, P.; Fournier, PE.; Chaudet, H.; et al. Analysis of SARS-CoV-2 Variants From 24,181 Patients Exemplifies the Role of Globalization and Zoonosis in Pandemics. *Front Microbiol*. **2022**, *12*, 786233. doi: 10.3389/fmicb.2021.786233.
3. Robinson, J.T.; Thorvaldsdottir, H.; Wenger, A.M.; Zehir, A.; Mesirov, J.P. Variant Review with the Integrative Genomics Viewer (IGV). *Cancer Research* **2017**, *77*, 31-34.
4. Alm, E.; Broberg, EK.; Connor, T.; et al. Geographical and temporal distribution of SARS-CoV-2 clades in the WHO European Region, January to June 2020. *Euro Surveill*. **2020**, *25*, 2001410.
